# Supplementary material for: Brønsted acid-promoted [3 + 3] cycloaddition of azomethine ylides with quinone monoimine: a practical method towards dihydrobenzoxazine derivatives
Source: Royal Society of Chemistry journal article supplement (doi:10.1039/c5ra12401h), 2015-01-01
Supplement: c5ra12401h1.pdf [file c5ra12401h1.pdf]

Supporting Information

**Brønsted Acid-Promoted [3 + 3] Cycloaddition of Azomethine Ylides  
with Quinone Monoimine: A Practical Method towards  
Dihydrobenzoxazine Derivatives**

Yang Wu, Guanyu Qiao, Honglei Liu, Lei Zhang, Zhanhu Sun, Yumei Xiao, and Hongchao Guo\*

Contents

|                                                                       |         |
|-----------------------------------------------------------------------|---------|
| General Information                                                   | S2      |
| Preparation of $\alpha$ -Iminoesters <b>2</b>                         | S2      |
| General Procedure for Phosphoric Acid-Catalyzed [3 + 3] cycloaddition | S3      |
| General Procedure for [3+3] cycloaddition on the Gram Scale           | S3      |
| Characterization Data for the Cycloaddition Products <b>3</b>         | S4–S10  |
| NMR Spectra of products <b>3</b>                                      | S11–S31 |
| X-Ray Crystallographic Data of <b>3a</b>                              | S32     |

## General Information

All reactions were performed under N<sub>2</sub> atmospheres in oven-dried glassware with magnetic stirring. Unless otherwise stated, all reagents were purchased from commercial suppliers and used without further purification. Dichloromethane and dichloroethane employed in the reactions was freshly distilled from CaH<sub>2</sub>. Quinone monoimines were prepared by the literature.<sup>1</sup> Organic solutions were concentrated under reduced pressure on a rotary evaporator or an oil pump. Reactions were monitored through thin layer chromatography (TLC) on silica gel–precoated glass plates. Flash column chromatography was performed using Qingdao Haiyang flash silica gel (200–300 mesh). Infrared spectra were recorded using a Bruker Optics TENSOR 27 instrument. <sup>1</sup>H and <sup>13</sup>C NMR spectra were recorded in CDCl<sub>3</sub> using a 300MHz NMR instrument (referenced internally to Me<sub>4</sub>Si). Chemical shifts (δ, ppm) are relative to tetramethylsilane (TMS) with the resonance of the non-deuterated solvent or TMS as the internal standard. <sup>1</sup>H NMR data are reported as follows: chemical shift, multiplicity (s = singlet; d = doublet; q = quartet; m = multiplet; br = broad), coupling constant (Hz), and integral. Data for <sup>13</sup>C NMR spectra are reported in terms of chemical shift. Optical rotation was obtained on an Autopol V Plus polarimeter. Accurate mass measurements were performed using an Agilent instrument with the ESI-MS technique.

## Preparation of α-Iminoesters 2<sup>2</sup>

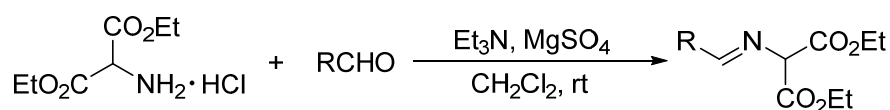

All α-iminoesters were prepared using the reported procedure. A suspension of diethyl-2-aminomalonate hydrochloride (14.8 mmol), MgSO<sub>4</sub> (14.8 mmol) and Et<sub>3</sub>N (14.8 mmol) in dry CH<sub>2</sub>Cl<sub>2</sub> (36 mL) was stirred at room temperature for 1 h, and aldehyde (16.2 mmol) was added. The resulting mixture was stirred at room temperature for 12 h, and then was filtered. To the filtrate was added water (5 mL). The organic layer was separated and the aqueous phase was extracted with CH<sub>2</sub>Cl<sub>2</sub> (10 mL). The combined organic layers were washed with brine, dried over MgSO<sub>4</sub> and evaporated under reduced pressure to afford α-iminoesters **2**, which was used in the next step without further purification.

## General Procedure for the [3 + 3] Cycloaddition of Azomethine Ylides with Quinone

### Monoimine by Phosphoric Acid

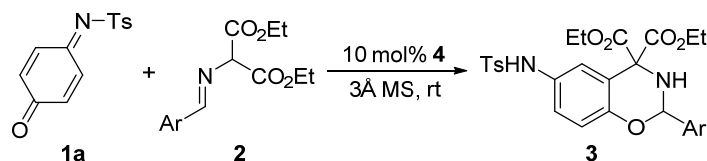

Under nitrogen atmosphere, phosphoric acid (10.4 mg, 0.03 mmol), quinone monoimine **1** (78.3 mg, 0.3 mmol) and 3Å MS (50 mg) were dissolved in 2 mL of DCE. The resulting mixture was stirred at rt for about 1 hour, followed by addition of  $\alpha$ -iminoesters **2** (0.45 mmol) and DCE or DCM (1 mL). Upon the completion of the reaction as monitored by TLC, the mixture was concentrated in vacuo. The residue was purified through flash column chromatography (EtOAc /petroleum ether) to afford the corresponding cycloaddition product.

### Phosphoric Acid-Catalyzed [3 + 3] Cycloaddition of Azomethine Ylide with Quinone

#### Monoimine on the Gram Scale

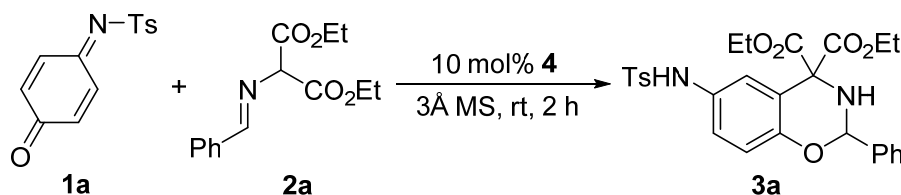

Under nitrogen atmosphere, phosphoric acid (0.13 g, 0.4 mmol), quinone monoimine **1** (1.04 g, 4 mmol) and 3Å MS (2.0 g) were dissolved in 20 mL of DCE. The resulting mixture was stirred at rt for about 1 hour, followed by addition of  $\alpha$ -iminoesters **2** (1.18 g, 4.5 mmol) and DCE (20 mL). Upon the completion of the reaction as monitored by TLC (about 2 hours), the mixture was concentrated in vacuo. The residue was purified through flash column chromatography (EtOAc/PE = 1:5) to afford the corresponding product as white solid, 1.78 g, 85%yield.

### References:

1. L. Liao, C. Shu, M. Zhang, Y. Liao, X. Hu, Y. Zhang, Z. Wu, W. Yuan, X. Zhang, *Angew. Chem. Int. Ed.* **2014**, *53*, 10471.
2. a) S. Cabrera, R. G. Arrayas, J. C. Carretero, *J. Am. Chem. Soc.* **2005**, *127*, 16394; b) J. L. Vicario, S. Reboredo, D. Badia, L. Carrillo, *Angew. Chem. Int. Ed.* **2007**, *46*, 5168.

### Characterization Data for the Cycloaddition Products 3

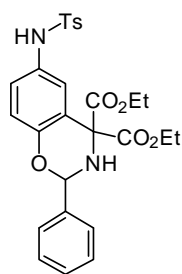

**Diethyl 6-(4-methylphenylsulfonamido)-2-phenyl-2H-benzo[e][1,3]oxazine-4,4(3H)-dicarboxylate (3a):** Prepared according to the general procedure as described above using phosphoric acid in 98% yield. Reaction time = 2 h. It was purified by flash chromatography (EtOAc/PE = 1/5) to afford white solid, m.p. 122–124 °C. <sup>1</sup>H NMR (300 MHz, CDCl<sub>3</sub>) δ 7.60 (dd, *J* = 7.7, 2.8 Hz, 4H), 7.41 (m, 4H), 7.21 (d, *J* = 8.1 Hz, 2H), 7.03 (s, 1H), 6.92 (dd, *J* = 8.8, 2.6 Hz, 1H), 6.81 (d, *J* = 8.8 Hz, 1H), 5.63 (d, *J* = 11.5 Hz, 1H), 4.43 – 4.10 (m, 4H), 3.54 (d, *J* = 11.5 Hz, 1H), 2.37 (s, 3H), 1.30 (q, *J* = 7.2 Hz, 6H); <sup>13</sup>C NMR (75 MHz, CDCl<sub>3</sub>) δ 169.2, 167.8, 152.8, 143.4, 137.5, 136.0, 129.4, 129.1, 128.8, 128.4, 127.1, 126.2, 125.1, 124.3, 118.4, 117.9, 83.9, 66.7, 63.1, 62.4, 21.3, 13.8, 13.7; IR (film)  $\nu_{\max}$  3264, 2983, 1732, 1598, 1496, 1463, 1390, 1328, 1240, 1161, 1092, 1030, 955, 862, 814, 736, 700, 666, 602, 557, 539; HRMS (ESI) calcd for C<sub>27</sub>H<sub>28</sub>N<sub>2</sub>O<sub>7</sub>S<sup>+</sup>(M+H)<sup>+</sup> 525.1695, found 525.1691.

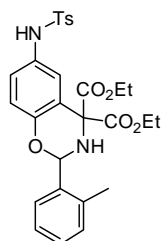

**Diethyl 6-(4-methylphenylsulfonamido)-2-(o-tolyl)-2H-benzo[e][1,3]oxazine-4,4(3H)-dicarboxylate (3b):** Prepared according to the general procedure as described above using phosphoric acid in 96% yield. Reaction time = 2h. It was purified by flash chromatography (EtOAc/PE = 1/5) to afford white solid, m.p. 150 – 151 °C. <sup>1</sup>H NMR (300 MHz, CDCl<sub>3</sub>) δ 7.71 – 7.64 (m, 1H), 7.61 (d, *J* = 8.3 Hz, 2H), 7.44 (d, *J* = 2.6 Hz, 1H), 7.24 (m, 5H), 7.02 (s, 1H), 6.91 (dd, *J* = 8.8, 2.6 Hz, 1H), 6.80 (d, *J* = 8.8 Hz, 1H), 5.73 (d, *J* = 12.1 Hz, 1H), 4.26 (m, 4H), 3.42 (d, *J* = 12.1 Hz, 1H), 2.38 (s, 3H), 2.37 (s, 3H), 1.30 (m, 6H); <sup>13</sup>C NMR (75 MHz, CDCl<sub>3</sub>) δ 169.2, 167.8, 153.3, 143.4, 136.0, 135.8, 135.7, 130.4, 129.4, 129.0, 128.7, 127.1, 126.0, 125.3, 125.2, 124.3, 118.4, 117.7, 81.7, 66.7, 63.1, 62.3, 21.3, 18.5, 13.9, 13.7; IR (film)  $\nu_{\max}$  3261, 2982, 1732, 1599, 1496, 1464, 1390, 1329, 1261, 1161, 1092, 1031, 963, 815, 732, 665, 610, 560, 542; HRMS (ESI) calcd for C<sub>28</sub>H<sub>30</sub>N<sub>2</sub>O<sub>7</sub>S<sup>+</sup>(M+H)<sup>+</sup> 539.1852, found 539.1848.

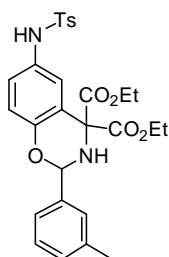

**Diethyl 6-(4-methylphenylsulfonamido)-2-(m-tolyl)-2H-benzo[e][1,3]oxazine-4,4(3H)-dicarboxylate (3c):** Prepared according to the general procedure as described above using phosphoric acid in 95% yield. Reaction time = 2h. It was purified by flash chromatography (EtOAc/PE = 1/5) to afford white solid, 148 – 149 °C. <sup>1</sup>H NMR (300 MHz, CDCl<sub>3</sub>) δ 7.58 (d, *J* = 8.3 Hz, 2H), 7.40 (dd, *J* = 8.5, 5.6 Hz, 3H), 7.30 (t, *J* = 7.6 Hz, 1H), 7.20 (t, *J* = 7.3 Hz, 3H), 6.89 (dd, *J* = 8.8, 2.6 Hz, 1H), 6.81 (d, *J* = 8.8 Hz, 1H), 6.60 (s, 1H), 5.57 (d, *J* = 11.4 Hz, 1H), 4.35 – 4.17 (m, 4H), 3.52 (d, *J* = 11.4 Hz, 1H), 2.38 (d, *J* = 1.4 Hz, 6H), 1.29 (q, *J* = 7.2 Hz, 6H); <sup>13</sup>C NMR (75 MHz, CDCl<sub>3</sub>) δ 169.2, 167.8, 152.9, 143.4, 138.1, 137.4, 136.0, 129.6, 129.4, 129.0, 128.3, 127.1, 126.7, 125.1, 124.3, 123.2, 118.4, 117.8, 84.0, 66.8, 63.0, 62.4, 21.3, 21.2, 13.8, 13.7; IR (film)  $\nu_{\max}$  3268, 2981, 2917, 1732, 1597, 1495, 1390, 1328, 1261, 1161, 1092, 1028, 814, 747, 667, 556, 539. HRMS (ESI) calcd for C<sub>28</sub>H<sub>30</sub>N<sub>2</sub>O<sub>7</sub>S<sup>+</sup>(M+H)<sup>+</sup> 539.1852, found 539.1845.

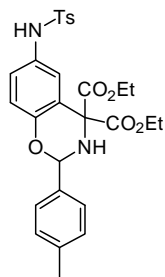

**Diethyl 6-(4-methylphenylsulfonamido)-2-(p-tolyl)-2H-benzo[e][1,3]oxazine-4,4(3H)-dicarboxylate (3d):** Prepared according to the general procedure as described above using phosphoric acid in 93% yield. Reaction time = 2h. It was purified by flash chromatography (EtOAc/PE = 1/5) to afford white solid, m.p. 130 – 131 °C. <sup>1</sup>H NMR (300 MHz, CDCl<sub>3</sub>) δ 7.60 (d, *J* = 8.3 Hz, 2H), 7.46 (dd, *J* = 10.0, 5.3 Hz, 3H), 7.20 (dd, *J* = 8.0, 3.9 Hz, 4H), 7.10 (d, *J* = 12.9 Hz, 1H), 6.91 (dd, *J* = 8.8, 2.6 Hz, 1H), 6.79 (d, *J* = 8.8 Hz, 1H), 5.59 (d, *J* = 11.4 Hz, 1H), 4.34 – 4.18 (m, 4H), 3.53 (d, *J* = 11.4 Hz, 1H), 2.36 (s, 6H), 1.32 – 1.25 (m, 6H); <sup>13</sup>C NMR (75 MHz, CDCl<sub>3</sub>) δ 169.3, 167.9, 152.9, 143.3, 138.6, 136.0, 134.7, 129.4, 129.1, 129.0, 127.1, 126.1, 125.1, 124.3, 118.3, 117.8, 83.9, 66.7, 63.0, 62.4, 21.3, 21.0, 13.8, 13.7; IR (film)  $\nu_{\max}$  3408, 3215, 2984, 1722, 1681, 1600, 1495, 1471, 1393, 1334, 1232, 1162, 1092, 1019, 814, 696, 552, 528; HRMS (ESI) calcd for C<sub>28</sub>H<sub>30</sub>N<sub>2</sub>O<sub>7</sub>S<sup>+</sup>(M+H)<sup>+</sup> 539.1852, found 539.1844.

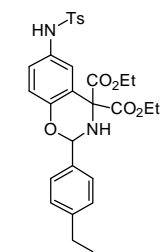

**Diethyl 2-(4-ethylphenyl)-6-(4-methylphenylsulfonamido)-2H-benzo[e][1,3]oxazine-4,4(3H)-dicarboxylate (3e):** Prepared according to the general procedure as described above using phosphoric acid in 93% yield. Reaction time = 2h. It was purified by flash chromatography (EtOAc/PE = 1/5) to afford white solid, m.p. 126 – 128 °C. <sup>1</sup>H NMR (300 MHz, CDCl<sub>3</sub>) δ 7.60 (d, *J* = 8.3 Hz, 2H), 7.50 (d, *J* = 8.1 Hz, 2H), 7.44 (d, *J* = 2.6 Hz, 1H), 7.24 – 7.18 (m, 3H), 6.98 (s, 1H), 6.90 (dd, *J* = 8.8, 2.6 Hz, 1H), 6.79 (d, *J* = 8.8 Hz, 1H), 5.59 (d, *J* = 11.3 Hz, 1H), 4.34 – 4.17 (m, 4H), 3.53 (d, *J* = 11.3 Hz, 1H), 2.66 (q, *J* = 7.6 Hz, 2H), 2.37 (s, 3H), 1.32 – 1.21 (m, 9H); <sup>13</sup>C NMR (75 MHz, CDCl<sub>3</sub>) δ 169.3, 167.8, 153.0, 145.1, 143.4, 136.0, 134.9, 129.4, 129.0, 127.9, 127.1, 126.2, 125.2, 124.4, 118.4, 117.8, 84.0, 66.7, 63.0, 62.35, 28.5, 21.3, 15.4, 13.8, 13.7; IR (film)  $\nu_{\max}$  3268, 2968, 2934, 2874, 1731, 1599, 1495, 1392, 1240, 1162, 1092, 1031, 964, 815, 735, 666, 545; HRMS (ESI) calcd for C<sub>29</sub>H<sub>32</sub>N<sub>2</sub>O<sub>7</sub>S<sup>+</sup>(M+H)<sup>+</sup> 553.2008, found 553.2002.

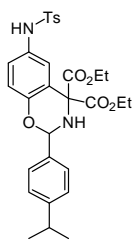

**Diethyl 2-(4-isopropylphenyl)-6-(4-methylphenylsulfonamido)-2H-benzo[e][1,3]oxazine-4,4(3H)-dicarboxylate (3f):** Prepared according to the general procedure as described above (solvent DCM instead of DCE) using phosphoric acid in 92% yield. Reaction time = 2 h. It was purified by flash chromatography (EtOAc/PE = 1/5) to afford pale yellow solid, m.p. 94 – 96 °C. <sup>1</sup>H NMR (300 MHz, CDCl<sub>3</sub>) δ 7.64 – 7.58 (m, 2H), 7.52 (d, *J* = 8.1 Hz, 2H), 7.45 (d, *J* = 2.5 Hz, 1H), 7.28 (dd, *J* = 10.8, 2.6 Hz, 2H), 7.24 – 7.15 (m, 2H), 7.11 (s, 1H), 6.92 (dd, *J* = 8.8, 2.6 Hz, 1H), 6.80 (d, *J* = 8.7 Hz, 1H), 5.60 (d, *J* = 11.3 Hz, 1H), 4.32 – 4.19 (m, 4H), 3.55 (d, *J* = 11.3 Hz, 1H), 2.99 – 2.87 (m, 1H), 2.37 (s, 3H), 1.32 – 1.25 (m, 12H). <sup>13</sup>C NMR (75 MHz, CDCl<sub>3</sub>) δ 169.3, 167.8, 153.0, 149.7, 143.3, 135.0, 129.4, 129.0, 127.1, 126.4, 126.2, 125.1, 124.3, 118.4, 117.8, 84.0, 66.8, 63.0, 62.4, 33.8, 23.8, 23.8, 21.3, 13.8, 13.7; IR (film)  $\nu_{\max}$  3270, 2963, 2256, 1731, 1599, 1576, 1492, 1157, 912, 815, 666, 552; HRMS (ESI) calcd for C<sub>30</sub>H<sub>34</sub>N<sub>2</sub>O<sub>7</sub>S<sup>+</sup>(M+H)<sup>+</sup> 567.2165, found 567.2160.

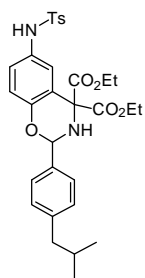

**Diethyl 2-(4-isobutylphenyl)-6-(4-methylphenylsulfonamido)-2H-benzo[e][1,3]oxazine-4,4(3H)-dicarboxylate (3g):** Prepared according to the general procedure as described above (solvent DCM instead of DCE) using phosphoric acid in 66% yield. Reaction time = 4 h. It was purified by flash chromatography (EtOAc/PE = 1/5) to afford yellow semi-solid.  $^1\text{H}$  NMR (300 MHz,  $\text{CDCl}_3$ )  $\delta$  7.60 (d,  $J = 8.3$  Hz, 2H), 7.50 (t,  $J = 6.8$  Hz, 2H), 7.44 (d,  $J = 2.6$  Hz, 1H), 7.20 (dd,  $J = 8.0, 5.6$  Hz, 4H), 6.99 (s, 1H), 6.91 (dd,  $J = 8.8, 2.6$  Hz, 1H), 6.80 (d,  $J = 8.8$  Hz, 1H), 5.60 (d,  $J = 11.4$  Hz, 1H), 4.33 – 4.17 (m, 4H), 3.54 (d,  $J = 11.4$  Hz, 1H), 2.48 (t,  $J = 7.1$  Hz, 2H), 2.37 (s, 3H), 1.86 (m, 1H), 1.30 (dt,  $J = 13.5, 4.3$  Hz, 6H), 0.90 (d,  $J = 6.6$  Hz, 6H);  $^{13}\text{C}$  NMR (75 MHz,  $\text{CDCl}_3$ )  $\delta$  169.3, 167.8, 153.0, 143.3, 142.5, 136.0, 134.9, 129.6, 129.4, 129.1, 129.0, 127.1, 125.9, 125.2, 124.4, 118.4, 117.8, 84.0, 66.7, 63.0, 62.4, 45.0, 30.0, 22.1, 21.3, 13.8, 13.7; IR (film)  $\nu_{\text{max}}$  3267, 2958, 2869, 1732, 1600, 1495, 1465, 1386, 1240, 1162, 1092, 1031, 911, 814, 732, 665, 600, 556; HRMS (ESI) calcd for  $\text{C}_{31}\text{H}_{36}\text{N}_2\text{O}_7\text{S}^+ (\text{M}+\text{H})^+$  581.2321, found 538.2316.

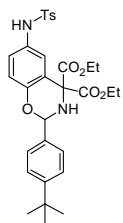

**Diethyl 2-(4-(tert-butyl)phenyl)-6-(4-methylphenylsulfonamido)-2H-benzo[e][1,3]oxazine-4,4(3H)-dicarboxylate (3h):** Prepared according to the general procedure as described above using phosphoric acid in 60% yield. Reaction time = 4h. It was purified by flash chromatography (EtOAc/PE = 1/5) to afford yellow semi-solid.  $^1\text{H}$  NMR (300 MHz,  $\text{CDCl}_3$ )  $\delta$  7.64 – 7.49 (m, 4H), 7.47 – 7.42 (m, 3H), 7.22 (d,  $J = 8.0$  Hz, 2H), 6.90 (dd,  $J = 8.8, 2.6$  Hz, 1H), 6.85 (s, 1H), 6.80 (d,  $J = 8.7$  Hz, 1H), 5.60 (d,  $J = 11.3$  Hz, 1H), 4.34 – 4.22 (m, 4H), 3.55 (d,  $J = 11.3$  Hz, 1H), 2.38 (s, 3H), 1.33 – 1.28 (m, 15H);  $^{13}\text{C}$  NMR (75 MHz,  $\text{CDCl}_3$ )  $\delta$  169.2, 167.8, 153.1, 152.0, 143.3, 136.0, 134.6, 129.4, 128.9, 127.1, 125.9, 125.3, 125.2, 124.5, 118.4, 117.8, 84.0, 34.5, 31.2, 31.1, 21.3, 13.8, 13.7. IR (film)  $\nu_{\text{max}}$  3270, 3060, 2964, 2871, 1732, 1599, 1494, 1368, 1219, 1161, 1028, 911, 815, 666, 610, 546; HRMS (ESI) calcd for  $\text{C}_{31}\text{H}_{36}\text{N}_2\text{O}_7\text{S}^+ (\text{M}+\text{H})^+$  581.2321, found 581.2314.

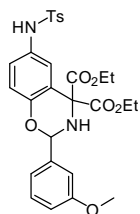

**Diethyl 2-(3-methoxyphenyl)-6-(4-methylphenylsulfonamido)-2H-benzo[e][1,3]oxazine-4,4(3H)-dicarboxylate (3i):** Prepared according to the general procedure as described above (solvent DCM instead of DCE) using phosphoric acid in 82% yield. Reaction time = 2h. It was purified by flash chromatography (EtOAc/PE = 1/5) to afford white solid, m.p. 125 – 127 °C.  $^1\text{H}$  NMR (300 MHz,  $\text{CDCl}_3$ )  $\delta$  7.60 (d,  $J = 8.3$  Hz, 2H), 7.44 (d,  $J = 2.5$  Hz, 1H), 7.34 (t,  $J = 7.9$  Hz, 1H), 7.26 – 7.13 (m, 4H), 6.97 – 6.89 (m, 2H), 6.84 (t,  $J = 7.9$  Hz, 2H), 5.60 (d,  $J = 11.3$  Hz, 1H), 4.37 – 4.15 (m, 4H), 3.84 (s, 3H), 3.56 (d,  $J = 11.4$  Hz, 1H), 2.39 (s, 3H), 1.31 (q,  $J = 7.2$  Hz, 6H);  $^{13}\text{C}$  NMR (75 MHz,  $\text{CDCl}_3$ )  $\delta$  169.2, 167.8, 159.6, 152.9, 143.4, 139.0, 136.0, 129.5, 129.4, 129.0, 127.1, 125.2, 124.5, 118.5, 118.4, 117.9, 114.5, 111.7, 83.8, 66.7, 63.0, 62.4, 55.2, 21.3, 13.8, 13.7; IR (film)  $\nu_{\text{max}}$  3262, 2982, 1732, 1598, 1495, 1466, 1391, 1329, 1262, 1161, 1092, 1036, 815, 737, 673, 604, 554; HRMS (ESI) calcd for  $\text{C}_{28}\text{H}_{30}\text{N}_2\text{O}_8\text{S}^+ (\text{M}+\text{H})^+$  555.1801, found 555.1797.

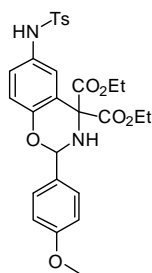

**Diethyl 2-(4-methoxyphenyl)-6-(4-methylphenylsulfonamido)-2H-benzo[e][1,3]oxazine-4,4(3H)-dicarboxylate (3j):** Prepared according to the general procedure as described above using phosphoric acid in 90% yield. Reaction time = 2 h. It was purified by flash chromatography (EtOAc/PE = 1/5) to afford yellow semi-solid.  $^1\text{H}$  NMR (300 MHz,  $\text{CDCl}_3$ )  $\delta$  7.62 – 7.54 (m, 2H), 7.51 (dd,  $J$  = 9.2, 2.4 Hz, 2H), 7.41 (d,  $J$  = 2.6 Hz, 1H), 7.24 – 7.16 (m, 2H), 6.91 (m, 3H), 6.79 (d,  $J$  = 8.8 Hz, 2H), 5.57 (d,  $J$  = 11.1 Hz, 1H), 4.22 (m, 4H), 3.81 (s, 3H), 3.49 (d,  $J$  = 11.1 Hz, 1H), 2.37 (s, 3H), 1.29 (m, 6H);  $^{13}\text{C}$  NMR (75 MHz,  $\text{CDCl}_3$ )  $\delta$  169.3, 167.8, 160.0, 153.0, 143.4, 136.0, 129.8, 129.4, 128.9, 127.5, 127.2, 127.1, 125.2, 124.5, 118.3, 117.8, 113.7, 83.8, 66.7, 63.0, 62.4, 55.2, 21.3, 13.8, 13.7; IR (film)  $\nu_{\text{max}}$  3259, 2981, 1732, 1599, 1577, 1513, 1393, 1261, 1161, 1092, 1025, 814, 672, 552; HRMS (ESI) calcd for  $\text{C}_{28}\text{H}_{30}\text{N}_2\text{O}_8\text{S}^+ (\text{M}+\text{H})^+$  555.1801, found 555.1796.

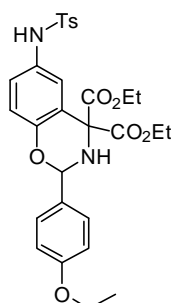

**Diethyl 2-(4-ethoxyphenyl)-6-(4-methylphenylsulfonamido)-2H-benzo[e][1,3]oxazine-4,4(3H)-dicarboxylate (3k):** Prepared according to the general procedure as described above using phosphoric acid in 93% yield. Reaction time = 2 h. It was purified by flash chromatography (EtOAc/PE = 1/5) to afford yellow semi-solid.  $^1\text{H}$  NMR (300 MHz,  $\text{CDCl}_3$ )  $\delta$  7.64 – 7.55 (m, 2H), 7.53 – 7.46 (m, 2H), 7.44 (d,  $J$  = 2.5 Hz, 1H), 7.20 (d,  $J$  = 8.0 Hz, 2H), 7.10 (d,  $J$  = 7.0 Hz, 1H), 6.96 – 6.86 (m, 3H), 6.78 (d,  $J$  = 8.8 Hz, 1H), 5.57 (d,  $J$  = 11.1 Hz, 1H), 4.33 – 4.16 (m, 4H), 4.04 (q,  $J$  = 7.0 Hz, 2H), 3.50 (d,  $J$  = 11.2 Hz, 1H), 2.36 (s, 3H), 1.44 – 1.37 (m, 3H), 1.29 (m, 6H);  $^{13}\text{C}$  NMR (75 MHz,  $\text{CDCl}_3$ )  $\delta$  169.3, 167.9, 159.3, 152.9, 143.3, 136.0, 130.2, 129.7, 129.4, 129.0, 127.5, 127.1, 125.1, 124.3, 118.3, 117.7, 114.3, 83.8, 66.8, 63.4, 63.0, 62.4, 21.3, 14.6, 13.8, 13.7; IR (film)  $\nu_{\text{max}}$  3410, 3217, 2984, 1731, 1681, 1601, 1576, 1512, 1393, 1238, 1161, 1116, 1092, 1043, 921, 814, 735, 697, 553, 528; HRMS (ESI) calcd for  $\text{C}_{29}\text{H}_{32}\text{N}_2\text{O}_8\text{S}^+ (\text{M}+\text{H})^+$  569.1958, found 569.1953.

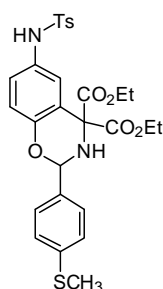

**Diethyl 6-(4-methylphenylsulfonamido)-2-(4-(methylthio)phenyl)-2H-benzo[e][1,3]oxazine-4,4(3H)-dicarboxylate (3l):** Prepared according to the general procedure as described above using phosphoric acid in 77% yield. Reaction time = 2 h. It was purified by flash chromatography (EtOAc/PE = 1/5) to afford white solid, yellow semi-solid.  $^1\text{H}$  NMR (300 MHz,  $\text{CDCl}_3$ )  $\delta$  7.58 (dd,  $J$  = 8.4, 1.8 Hz, 2H), 7.50 (d,  $J$  = 8.2 Hz, 2H), 7.42 (d,  $J$  = 2.5 Hz, 1H), 7.32 – 7.27 (m, 1H), 7.24 – 7.16 (m, 2H), 6.94 – 6.87 (m, 2H), 6.79 (d,  $J$  = 8.8 Hz, 1H), 5.57 (d,  $J$  = 11.4 Hz, 1H), 4.35 – 4.13 (m, 4H), 3.50 (d,  $J$  = 11.4 Hz, 1H), 2.48 (d,  $J$  = 4.6 Hz, 3H), 2.36 (s, 3H), 1.28 (q,  $J$  = 7.1 Hz, 6H);  $^{13}\text{C}$  NMR (75 MHz,  $\text{CDCl}_3$ )  $\delta$  169.2, 167.8, 152.8, 143.4, 139.5, 136.0, 134.3, 129.4, 129.0, 127.1, 126.7, 126.3, 125.2, 124.4, 118.4, 117.8, 83.6, 66.6, 63.1, 62.4, 21.3, 15.6, 13.8, 13.7. IR (film)  $\nu_{\text{max}}$  3261, 2982, 1732, 1694, 1592, 1495, 1392, 1327, 1228, 1161, 1092, 1020, 959, 814, 734, 671, 607, 561, 542; HRMS (ESI) calcd for  $\text{C}_{28}\text{H}_{30}\text{N}_2\text{O}_7\text{S}_2^+ (\text{M}+\text{H})^+$  571.1573, found 571.1567.

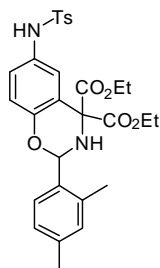

**Diethyl 2-(2,4-dimethylphenyl)-6-(4-methylphenylsulfonamido)-2H-benzo[e][1,3]oxazine-4,4(3H)-dicarboxylate (3m):** Prepared according to the general procedure as described above using phosphoric acid in 95% yield. Reaction time = 2h. It was purified by flash chromatography (EtOAc/PE = 1/5) to afford white solid, m.p 125 – 127 °C. <sup>1</sup>H NMR (300 MHz, CDCl<sub>3</sub>) δ 7.63 (d, *J* = 8.3 Hz, 2H), 7.56 (d, *J* = 7.9 Hz, 1H), 7.48 (d, *J* = 2.6 Hz, 1H), 7.28 (d, *J* = 7.1 Hz, 1H), 7.21 (d, *J* = 8.0 Hz, 2H), 7.13 – 6.99 (m, 2H), 6.93 (dd, *J* = 8.8, 2.6 Hz, 1H), 6.79 (d, *J* = 8.8 Hz, 1H), 5.72 (d, *J* = 12.0 Hz, 1H), 4.35 – 4.16 (m, 4H), 3.42 (d, *J* = 12.0 Hz, 1H), 2.34 (dd, *J* = 14.9, 5.2 Hz, 9H), 1.35 – 1.27 (m, 6H); <sup>13</sup>C NMR (75 MHz, CDCl<sub>3</sub>) δ 169.4, 167.9, 153.3, 143.3, 138.4, 136.1, 135.6, 132.9, 131.2, 129.4, 129.1, 127.1, 126.6, 125.3, 125.1, 124.2, 118.4, 117.7, 81.7, 66.8, 63.1, 62.3, 21.3, 20.9, 18.4, 13.9, 13.7; IR (film)  $\nu_{\max}$  3264, 2983, 1732, 1598, 1495, 1392, 1331, 1245, 1162, 1092, 1033, 967, 927, 815, 735, 666, 613, 570, 549; HRMS (ESI) calcd for C<sub>29</sub>H<sub>32</sub>N<sub>2</sub>O<sub>7</sub>S<sup>+</sup>(M+H)<sup>+</sup> 553.2008, found 563.2004.

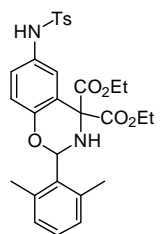

**Diethyl 2-(2,6-dimethylphenyl)-6-(4-methylphenylsulfonamido)-2H-benzo[e][1,3]oxazine-4,4(3H)-dicarboxylate (3n):** Prepared according to the general procedure as described above (solvent DCM instead of DCE) using phosphoric acid in 58% yield. Reaction time = 2h. It was purified by flash chromatography (EtOAc/PE = 1/5) to afford pale yellow solid, m.p. 120 – 122 °C. <sup>1</sup>H NMR (300 MHz, CDCl<sub>3</sub>) δ 7.69 – 7.58 (m, 2H), 7.45 (d, *J* = 2.6 Hz, 1H), 7.25 (dd, *J* = 8.6, 0.6 Hz, 2H), 7.16 (dd, *J* = 8.4, 6.6 Hz, 1H), 7.05 (d, *J* = 7.6 Hz, 2H), 6.92 (dd, *J* = 8.8, 2.6 Hz, 1H), 6.83 (s, 1H), 6.77 (d, *J* = 8.8 Hz, 1H), 5.98 (d, *J* = 10.5 Hz, 1H), 4.33 – 4.19 (m, 4H), 3.79 (d, *J* = 10.5 Hz, 1H), 2.48 (s, 6H), 2.39 (s, 3H), 1.33 – 1.26 (m, 6H); <sup>13</sup>C NMR (75 MHz, CDCl<sub>3</sub>) δ 169.5, 167.9, 153.0, 143.4, 136.6, 136.2, 133.0, 129.4, 129.3, 128.7, 128.6, 127.1, 125.3, 124.8, 118.3, 117.4, 82.6, 66.6, 63.0, 62.4, 21.3, 20.2, 13.8, 13.7; IR (film)  $\nu_{\max}$  3263, 2982, 1732, 1596, 1496, 1469, 1392, 1330, 1239, 1162, 1092, 1030, 911, 814, 777, 732, 666, 617, 67, 545; HRMS (ESI) calcd for C<sub>29</sub>H<sub>32</sub>N<sub>2</sub>O<sub>7</sub>S<sup>+</sup>(M+H)<sup>+</sup> 553.2008, found 553.2004.

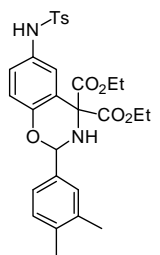

**Diethyl 2-(3,4-dimethylphenyl)-6-(4-methylphenylsulfonamido)-2H-benzo[e][1,3]oxazine-4,4(3H)-dicarboxylate (3o):** Prepared according to the general procedure as described above using phosphoric acid in 74% yield. Reaction time = 2h. It was purified by flash chromatography (EtOAc/PE = 1/5) to afford white solid, m.p. 118 – 120 °C. <sup>1</sup>H NMR (300 MHz, CDCl<sub>3</sub>) δ 7.59 (d, *J* = 8.2 Hz, 2H), 7.43 (d, *J* = 2.5 Hz, 1H), 7.37 – 7.28 (m, 2H), 7.18 (dd, *J* = 11.6, 8.0 Hz, 3H), 6.95 (s, 1H), 6.90 (dd, *J* = 8.7, 2.5 Hz, 1H), 6.79 (d, *J* = 8.7 Hz, 1H), 5.56 (d, *J* = 11.2 Hz, 1H), 4.26 (m, *J* = 20.8, 14.8, 7.1 Hz, 4H), 3.52 (d, *J* = 11.2 Hz, 1H), 2.37 (s, 3H), 2.28 (s, 6H), 1.29 (dd, *J* = 13.2, 7.0 Hz, 6H); <sup>13</sup>C NMR (75 MHz, CDCl<sub>3</sub>) δ 169.3, 167.8, 143.3, 137.3, 136.6, 136.0, 135.0, 129.6, 129.4, 128.9, 127.2, 127.1, 125.1, 124.4, 123.5, 118.3, 117.8, 84.0, 66.8, 63.0, 62.3, 21.3, 19.6, 19.4, 13.8, 13.7; IR (film)  $\nu_{\max}$  3267, 2981, 1733, 1598, 1496, 1454, 1390, 1329, 1238, 1162, 1092, 1021, 924, 815, 735, 705, 672, 556, 542; HRMS (ESI) calcd for C<sub>29</sub>H<sub>32</sub>N<sub>2</sub>O<sub>7</sub>S<sup>+</sup>(M+H)<sup>+</sup> 553.2008, found 553.2002.



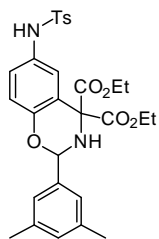

**Diethyl 2-(3,5-dimethylphenyl)-6-(4-methylphenylsulfonamido)-2H-benzo[e][1,3]oxazine-4,4(3H)-dicarboxylate (3p):** Prepared according to the general procedure as described above using phosphoric acid in 68% yield. Reaction time = 2h. It was purified by flash chromatography (EtOAc/PE = 1/5) to afford pale yellow solid, m.p. 123 – 125 °C. <sup>1</sup>H NMR (300 MHz, CDCl<sub>3</sub>) δ 7.62 (dd, *J* = 12.3, 5.8 Hz, 2H), 7.44 (d, *J* = 2.6 Hz, 1H), 7.22 (d, *J* = 7.8 Hz, 4H), 7.02 (s, 1H), 6.96 – 6.86 (m, 2H), 6.81 (d, *J* = 8.8 Hz, 1H), 5.55 (d, *J* = 11.3 Hz, 1H), 4.27 (m, 4H), 3.53 (d, *J* = 11.4 Hz, 1H), 2.37 (d, *J* = 5.4 Hz, 3H), 2.35 (s, 6H), 1.34 – 1.27 (m, 6H); <sup>13</sup>C NMR (75 MHz, CDCl<sub>3</sub>) δ 169.3, 167.8, 153.0, 143.4, 138.0, 137.4, 136.0, 130.5, 129.4, 129.0, 127.1, 125.2, 124.4, 123.8, 118.4, 117.8, 84.1, 66.8, 63.0, 62.4, 21.30, 21.11, 13.8, 13.7; IR (film)  $\nu_{\max}$  3264, 2982, 1732, 1599, 1495, 1390, 1329, 1238, 1161, 1092, 1025, 915, 855, 814, 731, 666, 614, 560, 544; HRMS (ESI) calcd for C<sub>29</sub>H<sub>32</sub>N<sub>2</sub>O<sub>7</sub>S<sup>+</sup>(M+H)<sup>+</sup> 553.2008, found 553.2004.

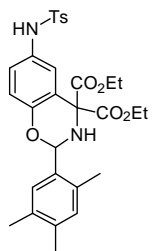

**Diethyl 6-(4-methylphenylsulfonamido)-2-(2,4,5-trimethylphenyl)-2H-benzo[e][1,3]oxazine-4,4(3H)-dicarboxylate (3q):** Prepared according to the general procedure as described above using phosphoric acid in 76% yield. Reaction time = 4h. It was purified by flash chromatography (EtOAc/PE = 1/5) to afford white solid, m.p. 76 – 78 °C. <sup>1</sup>H NMR (300 MHz, CDCl<sub>3</sub>) δ 7.63 – 7.56 (m, 2H), 7.42 (d, *J* = 2.3 Hz, 2H), 7.26 – 7.20 (m, 2H), 6.97 (s, 1H), 6.89 (dd, *J* = 8.8, 2.6 Hz, 1H), 6.81 (d, *J* = 8.7 Hz, 1H), 6.52 (s, 1H), 5.68 (d, *J* = 11.7 Hz, 1H), 4.33 – 4.18 (m, 4H), 3.41 (d, *J* = 11.7 Hz, 1H), 2.39 (s, 3H), 2.31 (s, 3H), 2.27 (s, 3H), 2.24 (s, 3H), 1.33 – 1.26 (m, 6H); <sup>13</sup>C NMR (75 MHz, CDCl<sub>3</sub>) δ 169.3, 167.9, 153.4, 143.3, 137.0, 136.1, 134.0, 133.0, 132.8, 131.8, 129.4, 128.9, 127.1, 126.4, 125.2, 124.4, 118.4, 117.7, 81.8, 66.8, 63.0, 62.3, 21.3, 19.2, 19.1, 17.9, 13.9, 13.7; IR (film)  $\nu_{\max}$  3273, 2980, 1734, 1617, 1496, 1448, 1368, 1215, 1161, 1092, 1032, 957, 861, 814, 735, 672, 551; HRMS (ESI) calcd for C<sub>30</sub>H<sub>34</sub>N<sub>2</sub>O<sub>7</sub>S<sup>+</sup>(M+H)<sup>+</sup> 567.2165, found 567.2158.

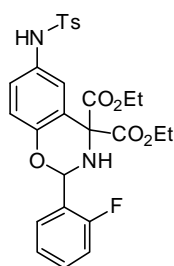

**Diethyl 2-(2-fluorophenyl)-6-(4-methylphenylsulfonamido)-2H-benzo[e][1,3]oxazine-4,4(3H)-dicarboxylate (3r):** Prepared according to the general procedure as described above (solvent DCM instead of DCE) using phosphoric acid in 81% yield. Reaction time = 6h. It was purified by flash chromatography (EtOAc/PE = 1/5) to afford yellow solid, m.p. 149 – 151 °C. <sup>1</sup>H NMR (300 MHz, CDCl<sub>3</sub>) δ 7.67 – 7.55 (m, 3H), 7.43 (d, *J* = 2.6 Hz, 1H), 7.40 – 7.30 (m, 1H), 7.24 – 7.03 (m, 5H), 6.93 (dd, *J* = 8.8, 2.6 Hz, 1H), 6.77 (d, *J* = 8.8 Hz, 1H), 5.84 (d, *J* = 12.0 Hz, 1H), 4.35 – 4.13 (m, 4H), 3.67 (d, *J* = 12.0 Hz, 1H), 2.36 (s, 3H), 1.29 (q, *J* = 7.0 Hz, 6H); <sup>13</sup>C NMR (75 MHz, CDCl<sub>3</sub>) δ 169.0, 167.7, 159.99 (d, *J* = 249.5 Hz), 152.8, 143.4, 135.9, 130.6 (d, *J* = 8.3 Hz), 129.38, 129.30, 127.45 (d, *J* = 3.3 Hz), 127.11, 125.1, 124.80 (d, *J* = 12.4 Hz), 124.22 (d, *J* = 3.5 Hz), 124.1, 118.4, 117.7, 115.6 (d, *J* = 21.1 Hz), 79.3 (d, *J* = 3.8 Hz), 66.8, 63.2, 62.5, 21.3, 13.7, 13.6; IR (film)  $\nu_{\max}$  3263, 2983, 1732, 1621, 1596, 1496, 1460, 1388, 1328, 1238, 1162, 1092, 1030, 939, 815, 763, 673, 609, 561, 543; HRMS (ESI) calcd for C<sub>27</sub>H<sub>27</sub>FN<sub>2</sub>O<sub>7</sub>S<sup>+</sup>(M+H)<sup>+</sup> 543.1601, found 543.1596.

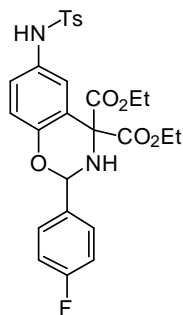

**Diethyl 2-(4-fluorophenyl)-6-(4-methylphenylsulfonamido)-2H-benzo[e]**

**[1,3]oxazine-4,4(3H)-dicarboxylate (3s):**

Prepared according to the general procedure as described above using phosphoric acid in 75% yield. Reaction time = 6h. It was purified by flash chromatography (EtOAc/PE = 1/5) to afford yellow semi-solid. <sup>1</sup>H NMR (300 MHz, CDCl<sub>3</sub>) δ 7.63 – 7.53 (m, 4H), 7.42 (d, *J* = 2.6 Hz, 1H), 7.19 (t, *J* = 8.2 Hz, 2H), 7.12 – 7.02 (m, 2H), 6.95 – 6.83 (m, 2H), 6.79 (d, *J* = 8.8 Hz, 1H), 5.59 (d, *J* = 11.5 Hz, 1H), 4.32 – 4.17 (m, 4H), 3.48 (d, *J* = 11.5 Hz, 1H), 2.36 (s, 3H), 1.32 – 1.26 (m, 6H); <sup>13</sup>C NMR (75 MHz,

CDCl<sub>3</sub>) δ 169.2, 167.7, 162.88 (d, *J* = 247.5 Hz), 152.6, 143.4, 136.0, 133.5 (d, *J* = 3.2 Hz), 129.4, 129.2, 128.1 (d, *J* = 8.4 Hz), 127.1, 126.9, 125.1, 124.3, 118.3, 117.8, 115.2 (d, *J* = 21.7 Hz), 83.3, 66.6, 63.1, 62.4, 21.3, 13.8, 13.6; IR (film)  $\nu_{\max}$  3265, 2983, 1732, 1600, 1496, 1390, 1329, 1228, 1160, 1092, 1030, 815, 737, 672, 545; HRMS (ESI) calcd for C<sub>27</sub>H<sub>27</sub>FN<sub>2</sub>O<sub>7</sub>S<sup>+</sup>(M+H)<sup>+</sup> 543.1601, found 543.1598.

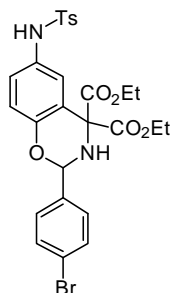

**Diethyl 2-(4-bromophenyl)-6-(4-methylphenylsulfonamido)-2H-benzo[e][1,3]**

**oxazine-4,4(3H)-dicarboxylate (3t):**

Prepared according to the general procedure as described above using phosphoric acid in 35% yield. Reaction time = 10h. It was purified by flash chromatography (EtOAc/PE = 1/5) to afford white solid, yellow semi-solid. <sup>1</sup>H NMR (300 MHz, CDCl<sub>3</sub>) δ 7.61 – 7.45 (m, 6H), 7.41 (d, *J* = 2.5 Hz, 1H), 7.21 (d, *J* = 8.0 Hz, 2H), 6.88 (dd, *J* = 8.8, 2.6 Hz, 1H), 6.80 (d, *J* = 8.7 Hz, 1H), 6.53 (s, 1H), 5.55 (d, *J* = 11.6 Hz, 1H), 4.33 – 4.18 (m, 4H), 3.48 (d, *J* = 11.6 Hz, 1H), 2.37 (s, 3H), 1.29 (dd, *J* = 13.6, 7.1 Hz, 6H); <sup>13</sup>C NMR (75 MHz,

CDCl<sub>3</sub>) δ 169.0, 167.7, 152.6, 143.4, 136.5, 136.0, 131.5, 129.4, 129.1, 128.0, 127.1, 125.2, 124.5, 122.9, 118.4, 117.9, 115.8, 83.22, 66.53, 63.12, 62.44, 21.30, 13.81, 13.65; IR (film)  $\nu_{\max}$  3267, 2982, 1732, 1597, 1494, 1393, 1369, 1329, 1261, 1161, 1092, 1013, 861, 813, 735, 666, 605, 560, 541; HRMS (ESI) calcd for C<sub>27</sub>H<sub>27</sub>BrN<sub>2</sub>O<sub>7</sub>S<sup>+</sup>(M+H)<sup>+</sup> 603.0801, found 603.0793.

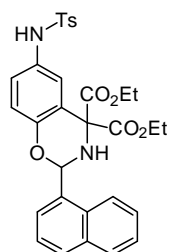

**Diethyl 6-(4-methylphenylsulfonamido)-2-(naphthalen-1-yl)-2H-benzo[e]**

**[1,3]oxazine-4,4(3H)-dicarboxylate (3u):**

Prepared according to the general procedure as described above using phosphoric acid in 60% yield. Reaction time = 4 h. It was purified by flash chromatography (EtOAc/PE = 1/5) to afford, brown semi-solid. <sup>1</sup>H NMR (300 MHz, CDCl<sub>3</sub>) δ 8.35 – 8.17 (m, 1H), 7.98 – 7.85 (m, 3H), 7.64 (t, *J* = 7.2 Hz, 2H), 7.59 – 7.48 (m, 4H), 7.25 (d, *J* = 8.0 Hz, 2H), 7.09 – 6.84 (m, 3H), 6.31 (d, *J* = 11.7 Hz, 1H), 4.50 – 4.33 (m, 2H), 4.31 – 4.13 (m, 2H), 3.66 (d, *J* = 11.7 Hz, 1H), 2.41 (d, *J* = 6.4 Hz, 3H), 1.41 (t, *J* = 7.1 Hz, 3H), 1.28 (t, *J* = 7.1 Hz, 3H); <sup>13</sup>C NMR (75 MHz, CDCl<sub>3</sub>) δ 169.3, 167.7, 153.1, 143.4, 136.1, 133.6, 133.0, 130.4, 129.5, 129.4,

129.1, 128.5, 127.1, 126.3, 125.6, 125.2, 125.0, 124.4, 123.8, 123.4, 118.5, 118.0, 81.9, 66.8, 63.1, 62.5, 21.3, 13.9, 13.7; IR (film)  $\nu_{\max}$  3261, 2982, 2927, 1732, 1598, 1495, 1392, 1331, 1261, 1161, 1092, 1030, 955, 804, 779, 736, 705, 673, 608, 558, 542; HRMS (ESI) calcd for C<sub>31</sub>H<sub>30</sub>N<sub>2</sub>O<sub>7</sub>S<sup>+</sup>(M+H)<sup>+</sup> 575.1852, found 575.1847.

### NMR Spectra of products 3

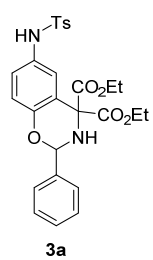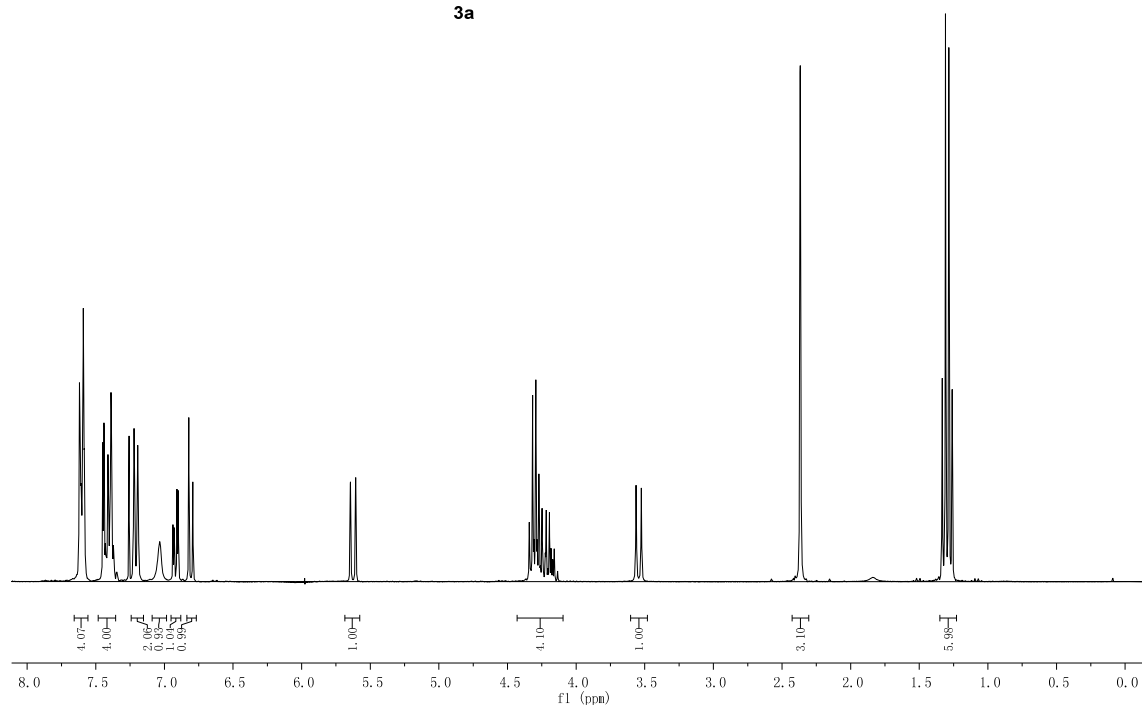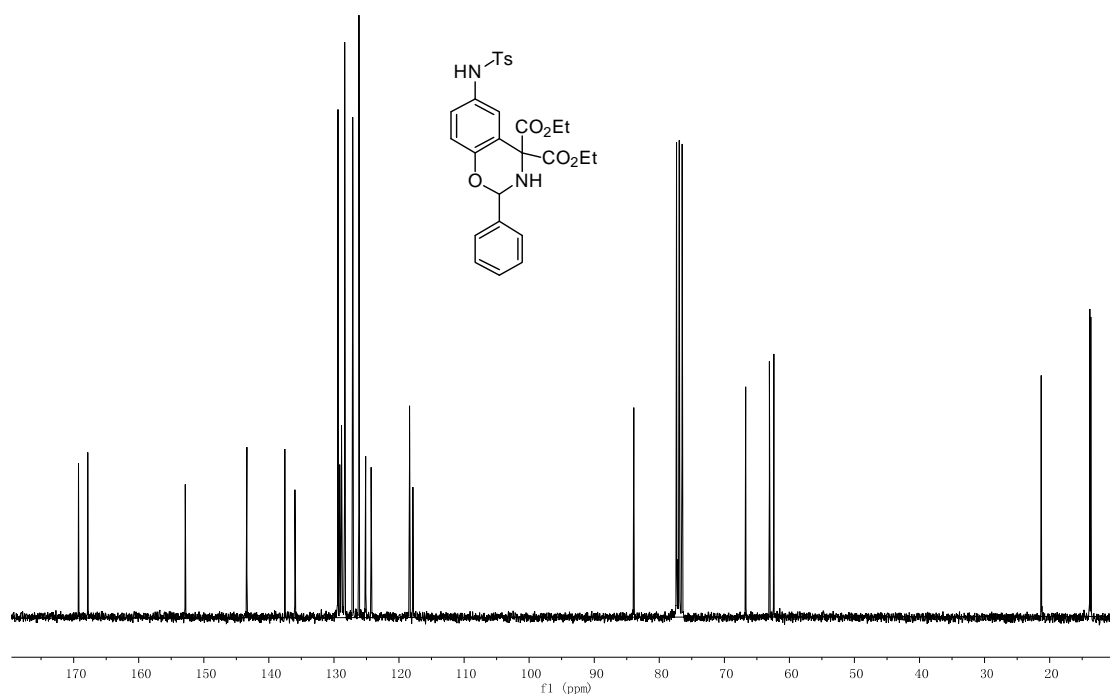

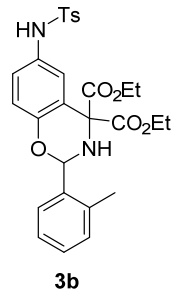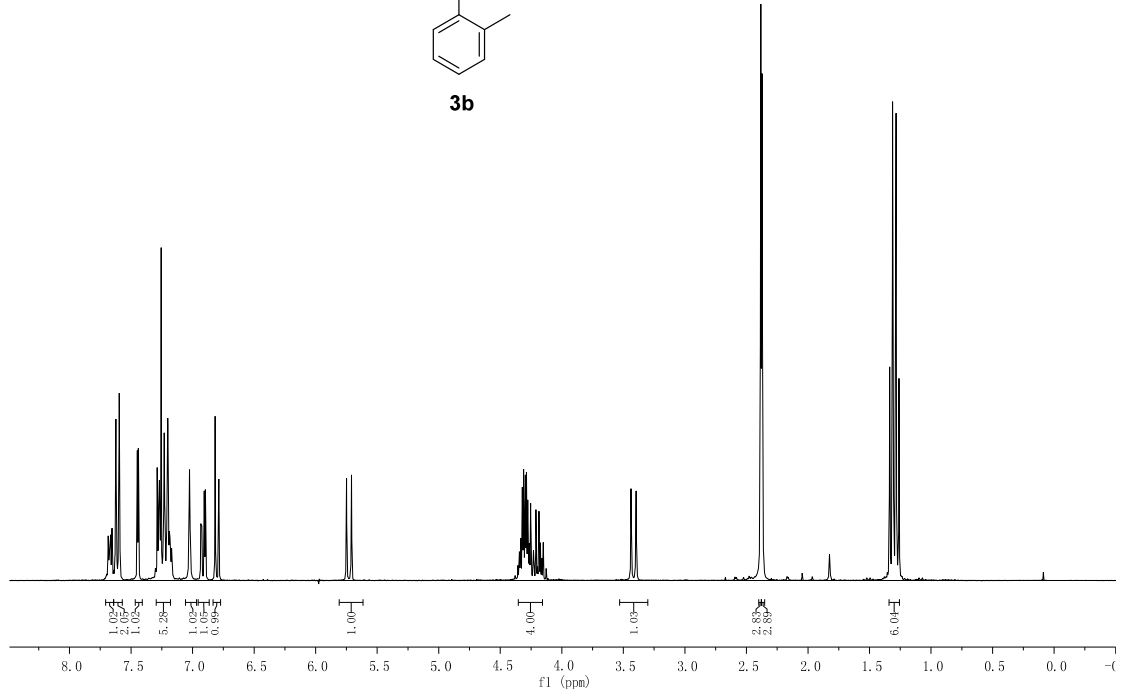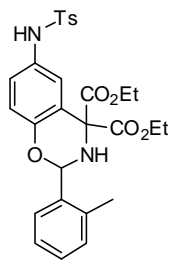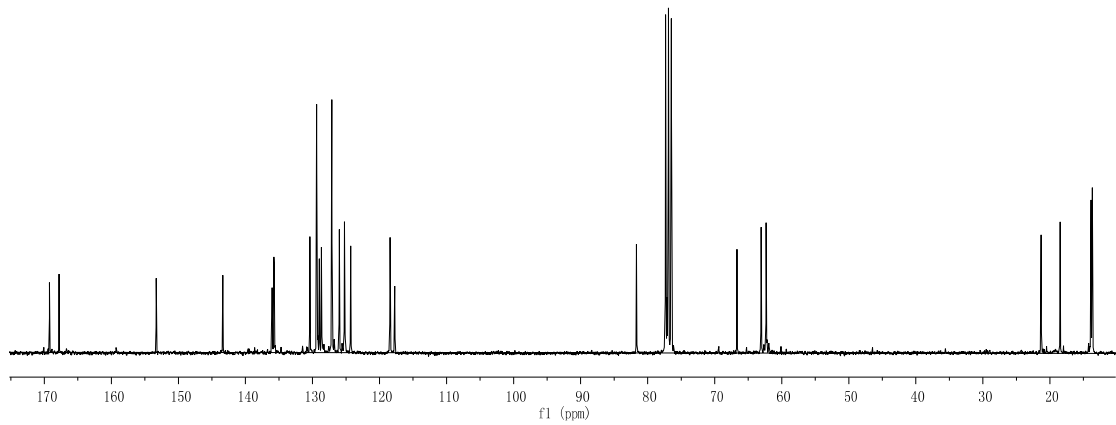

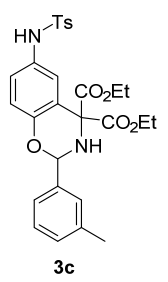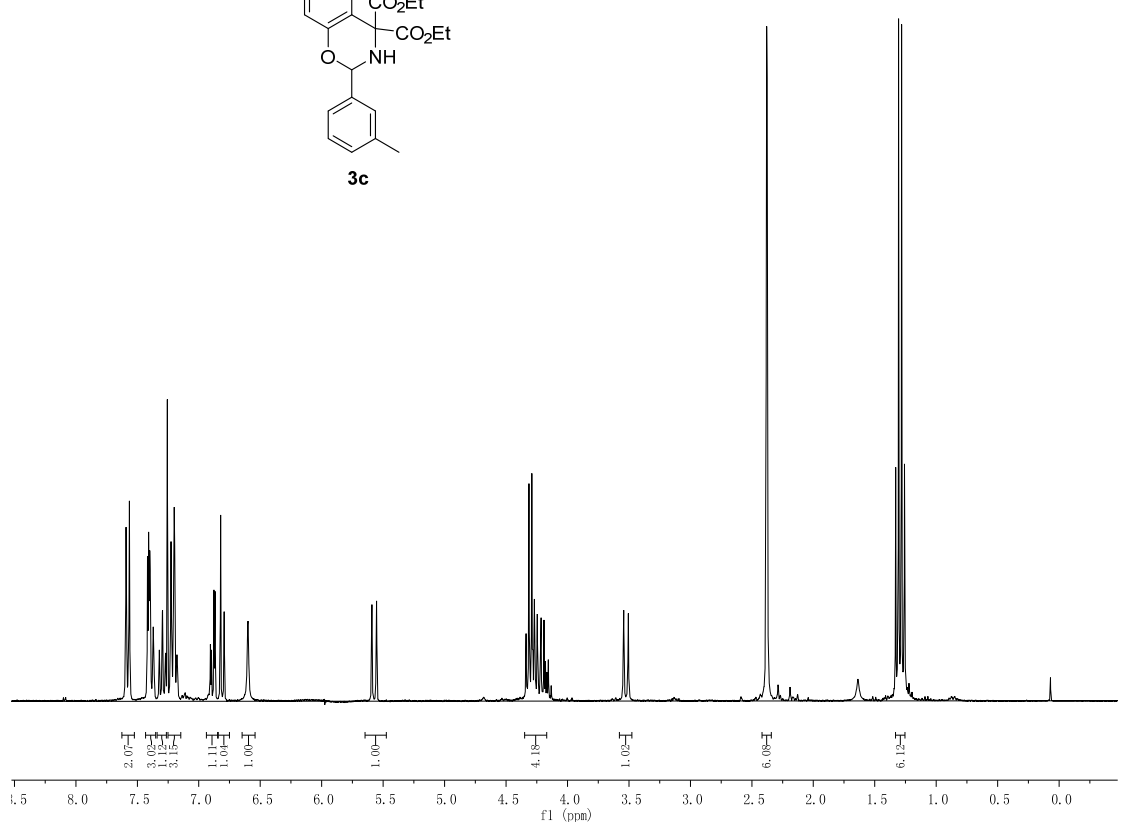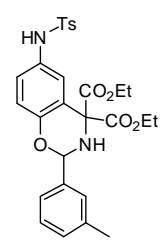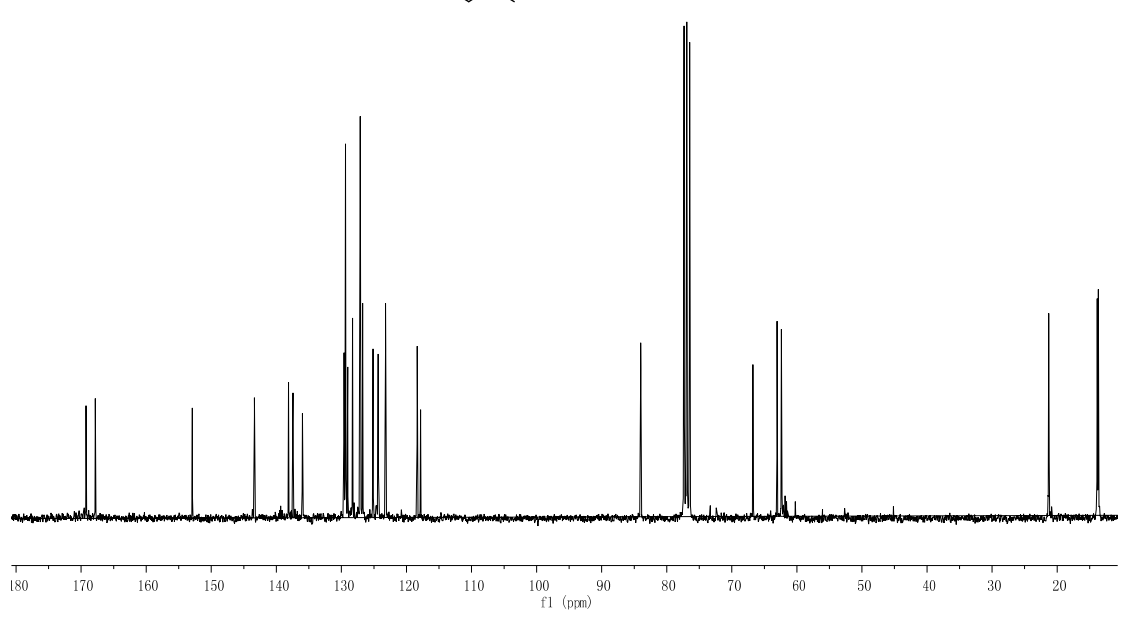

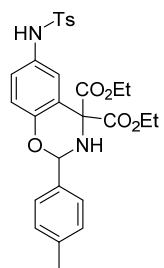

**3d**

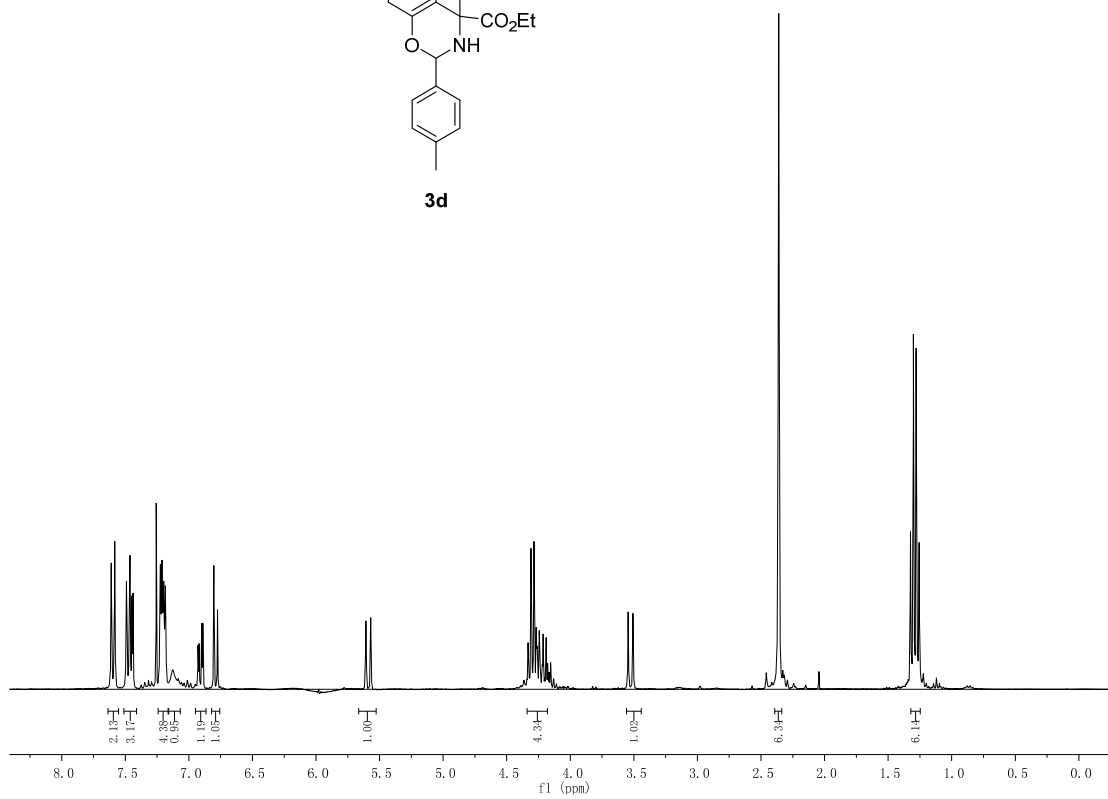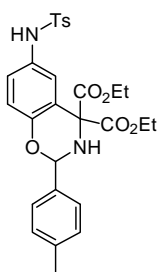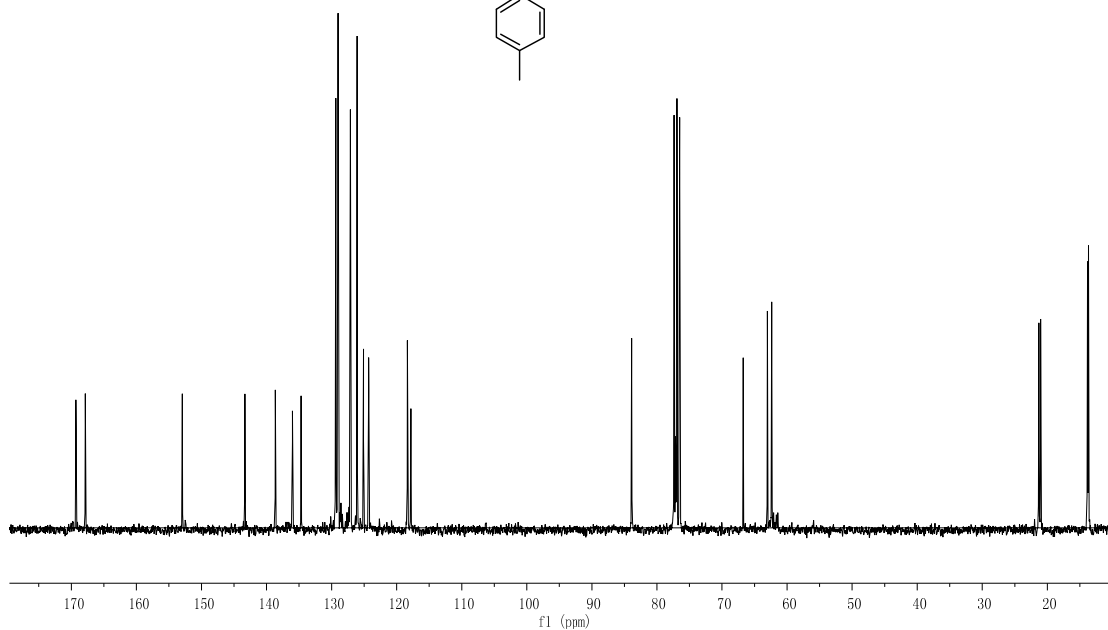

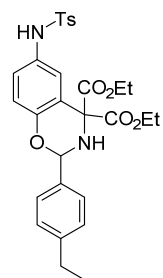

**3e**

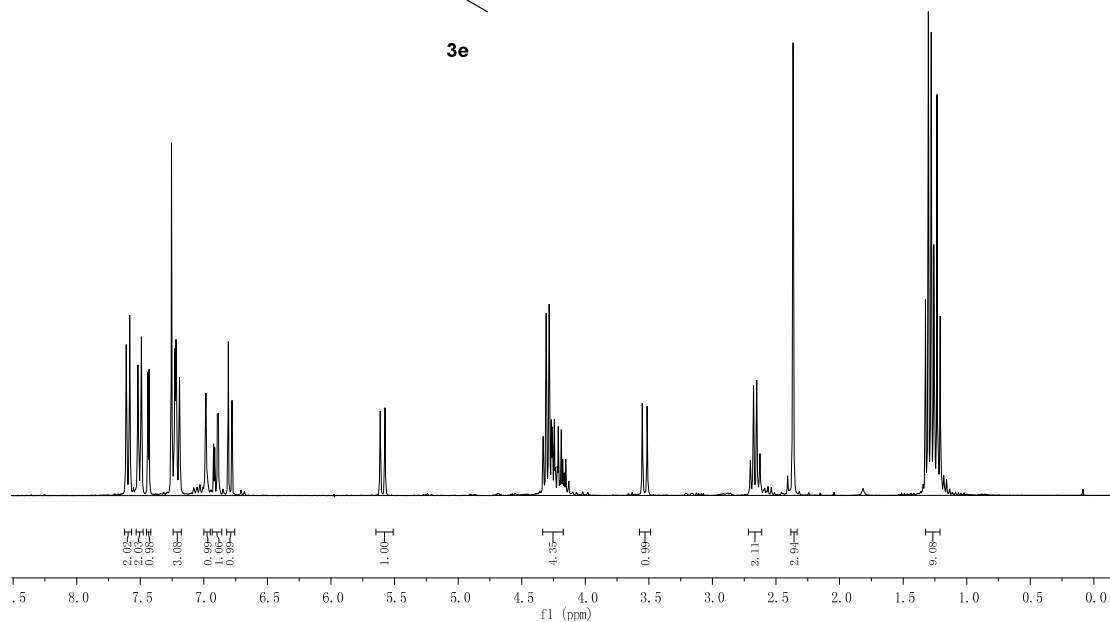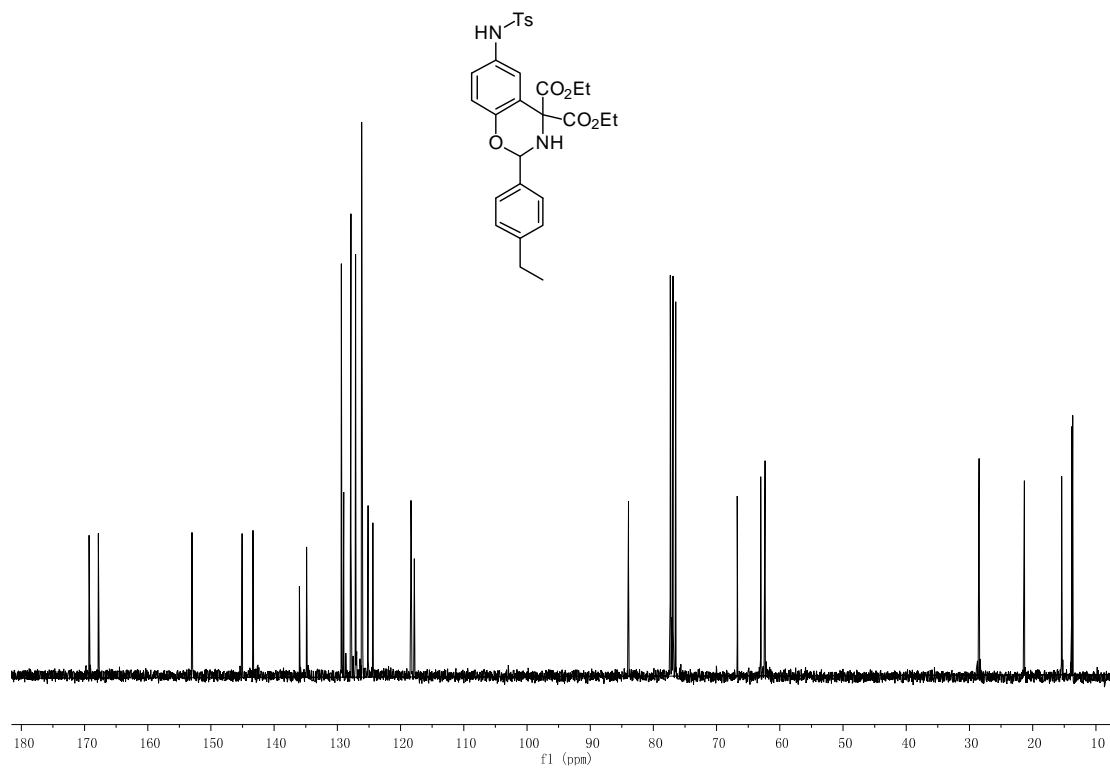

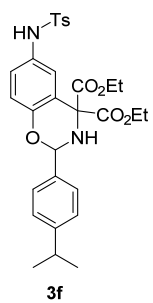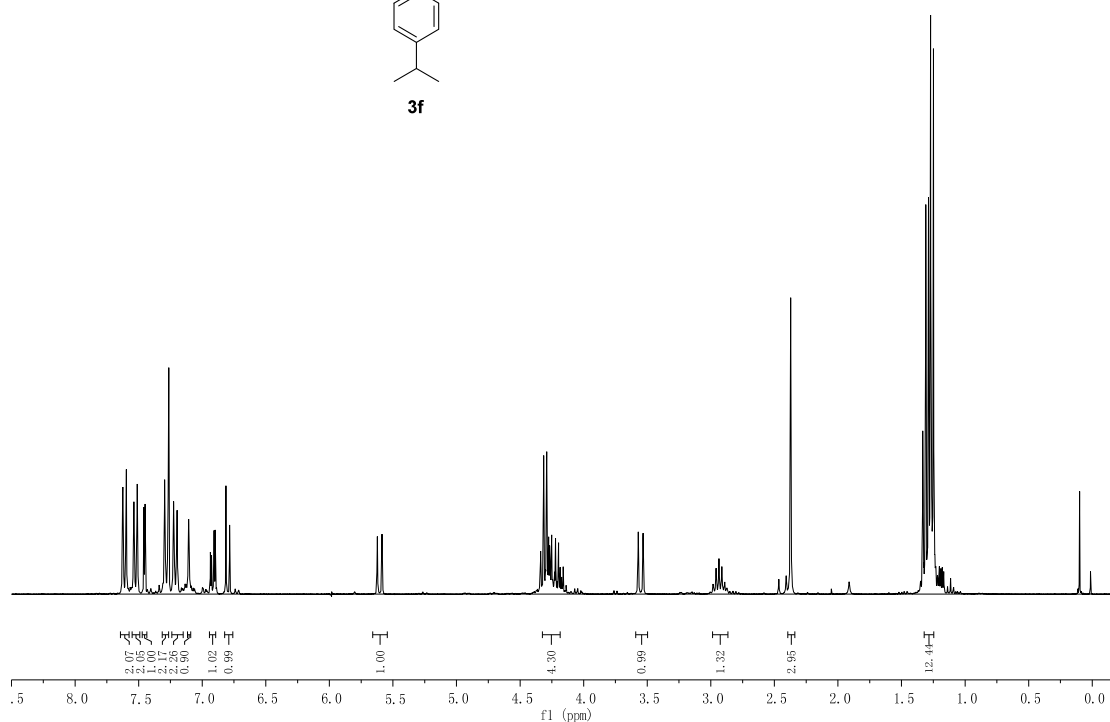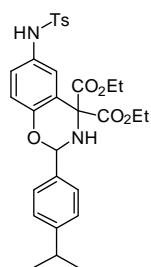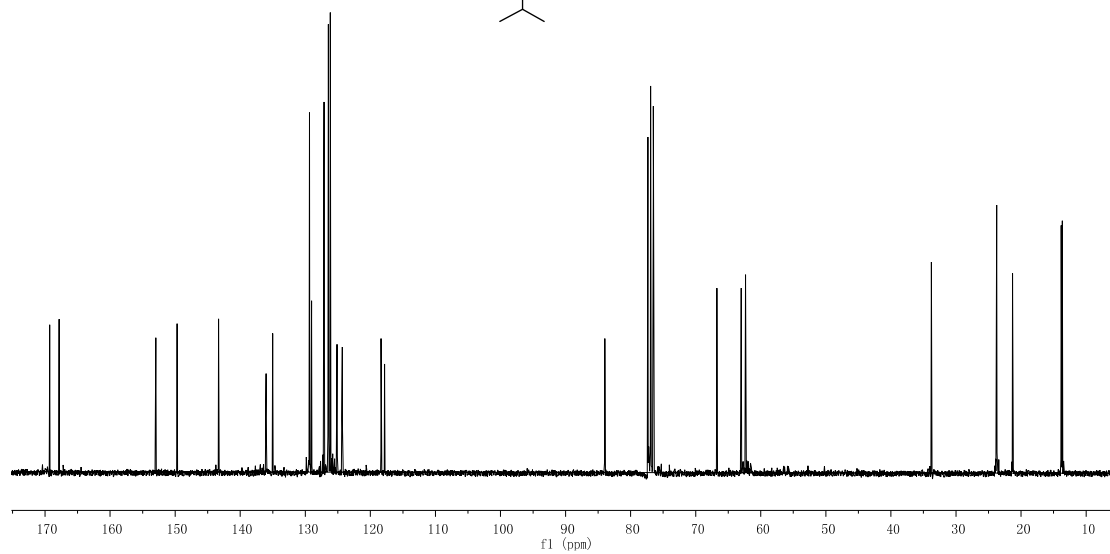



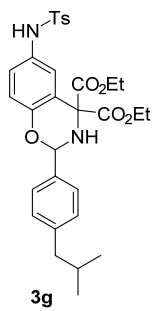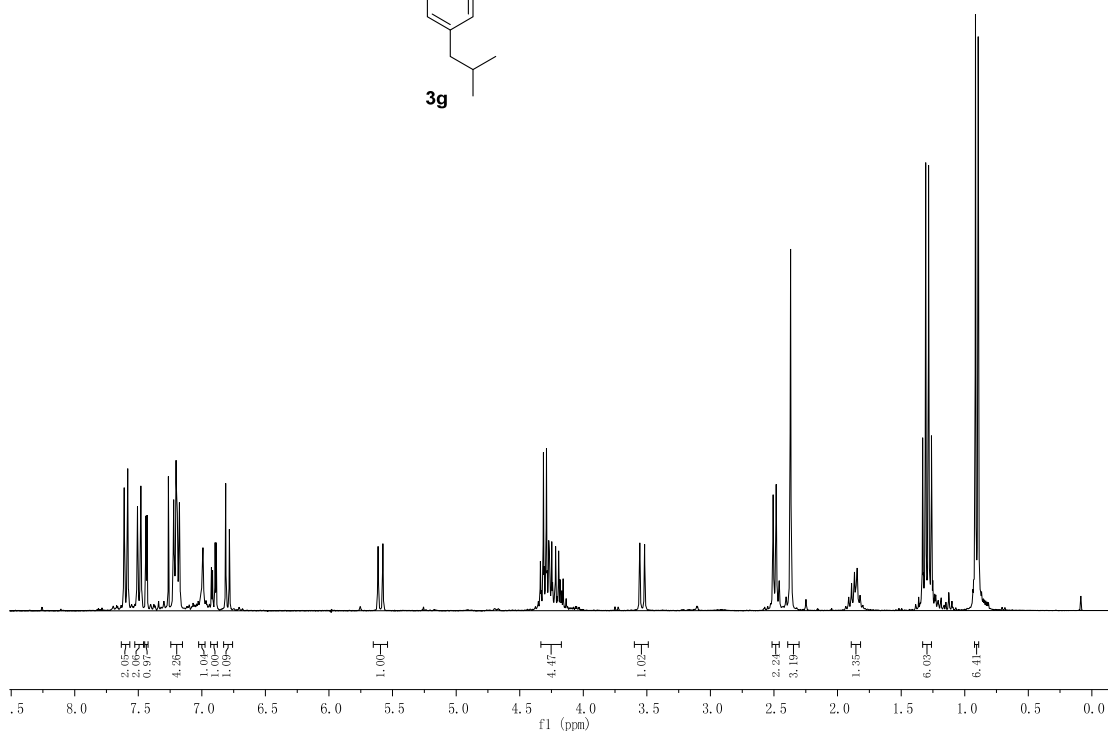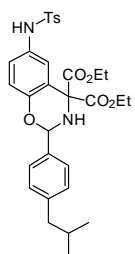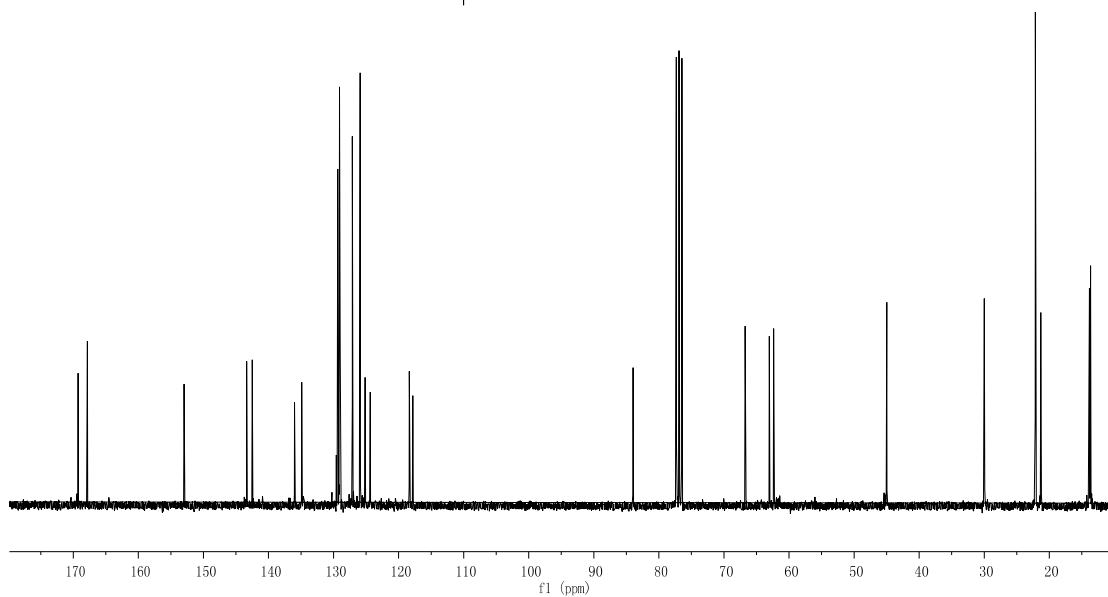

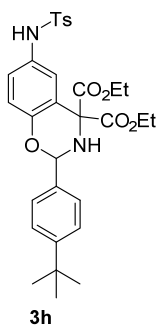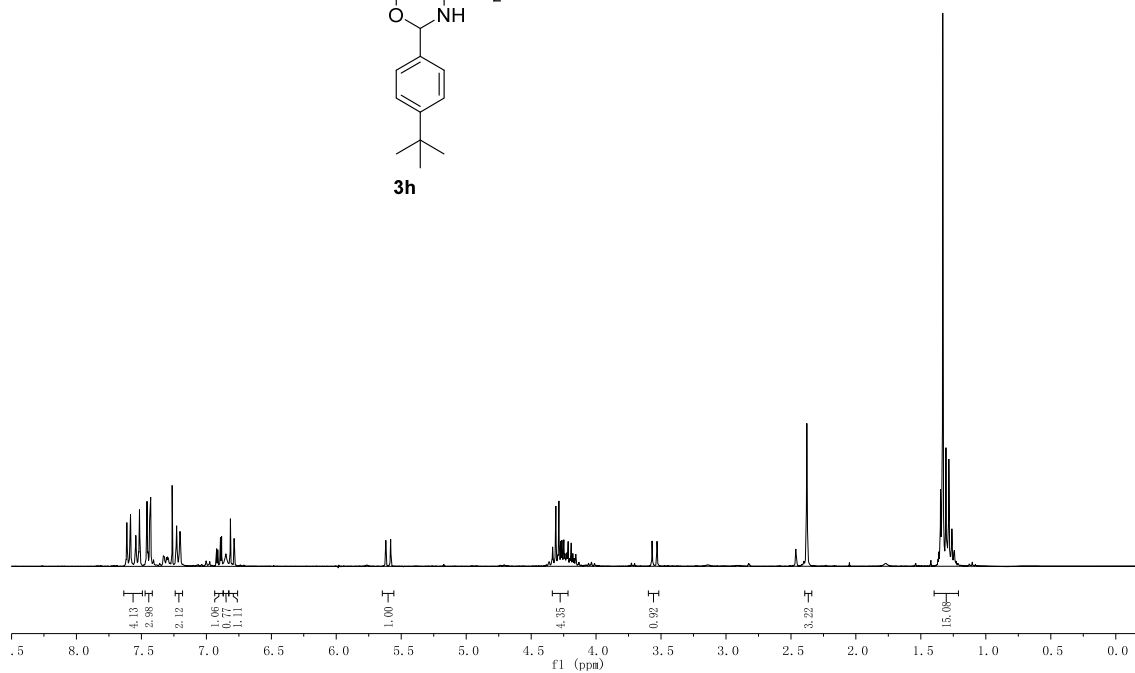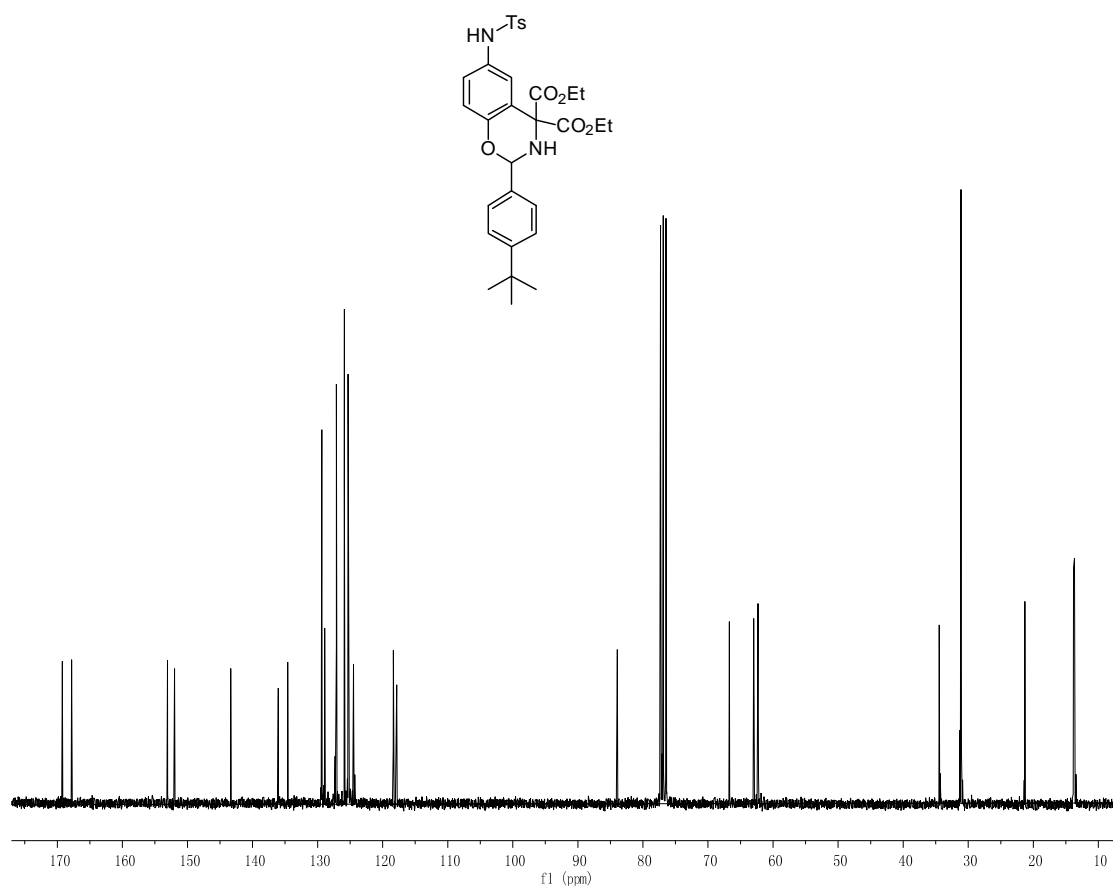

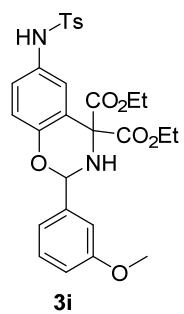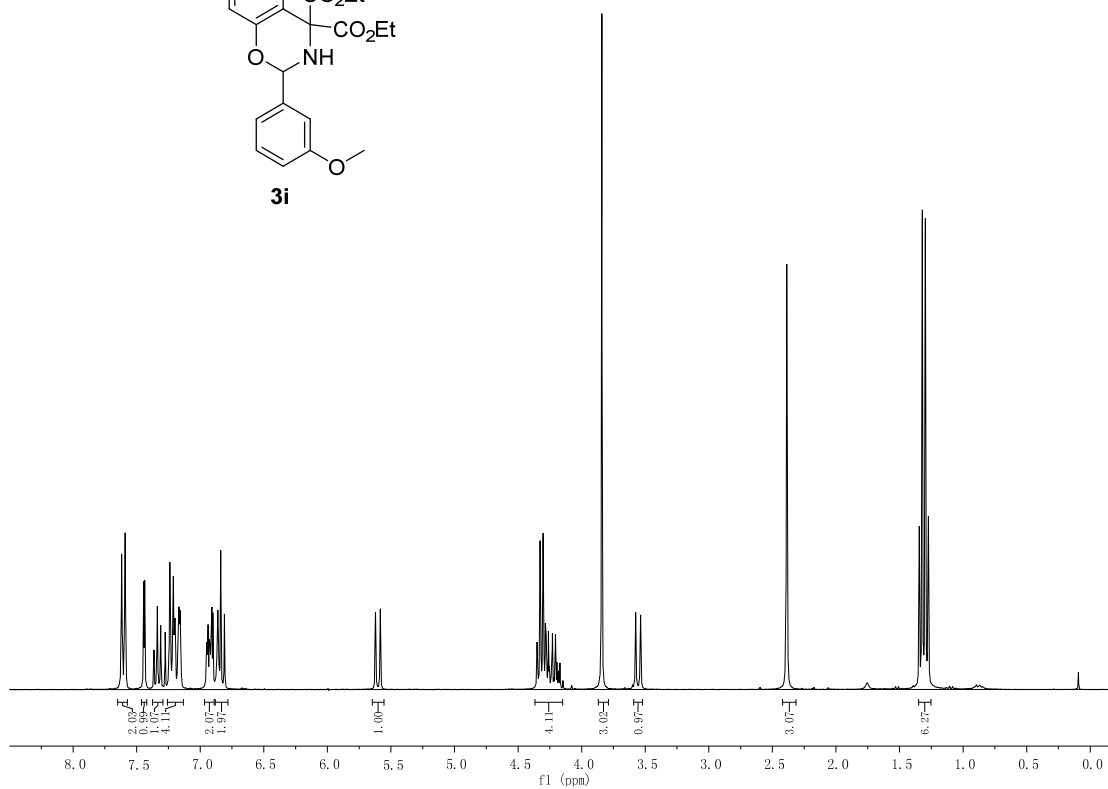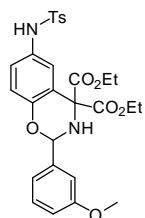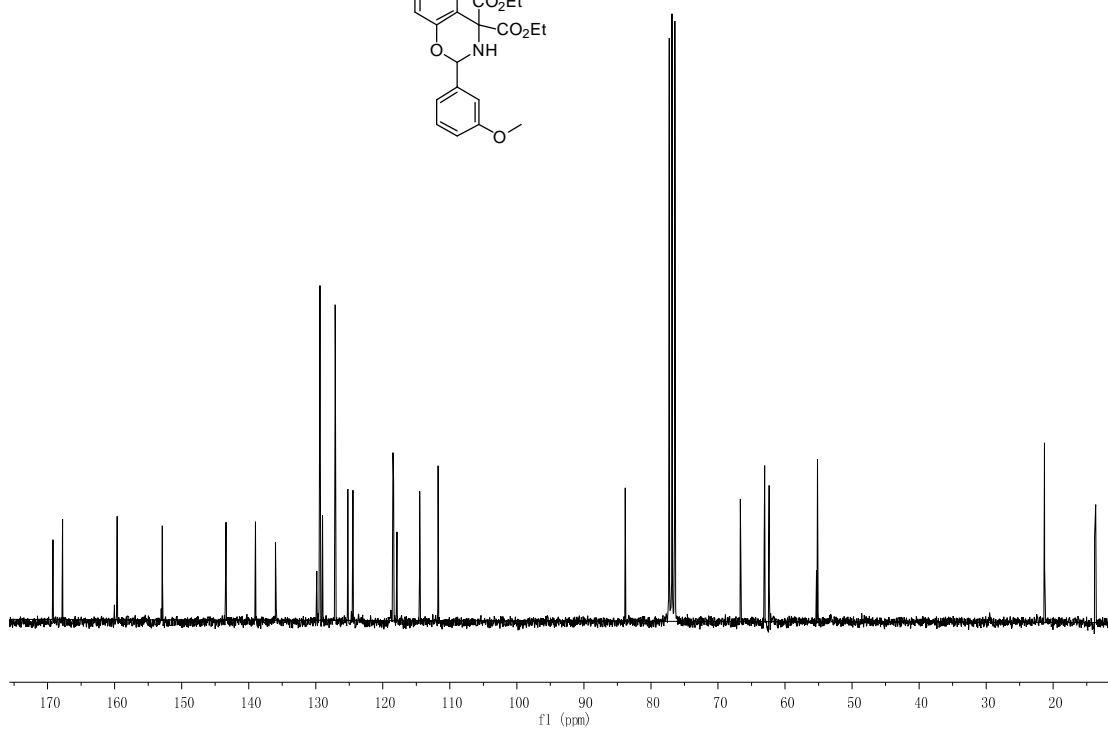

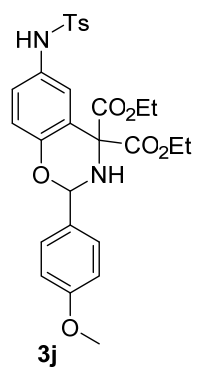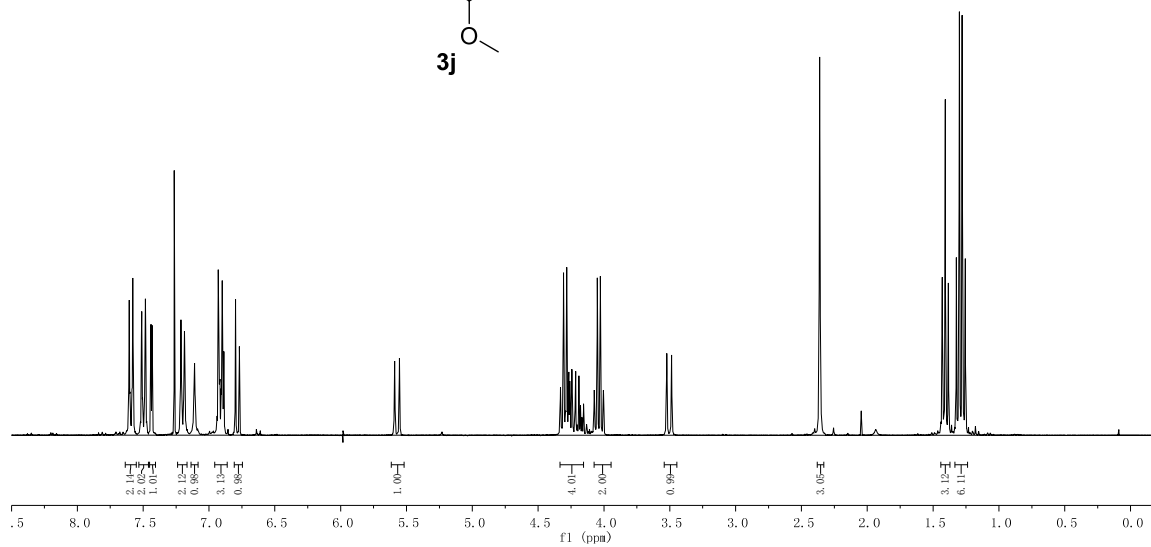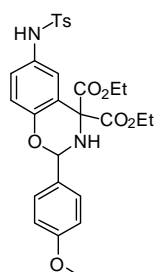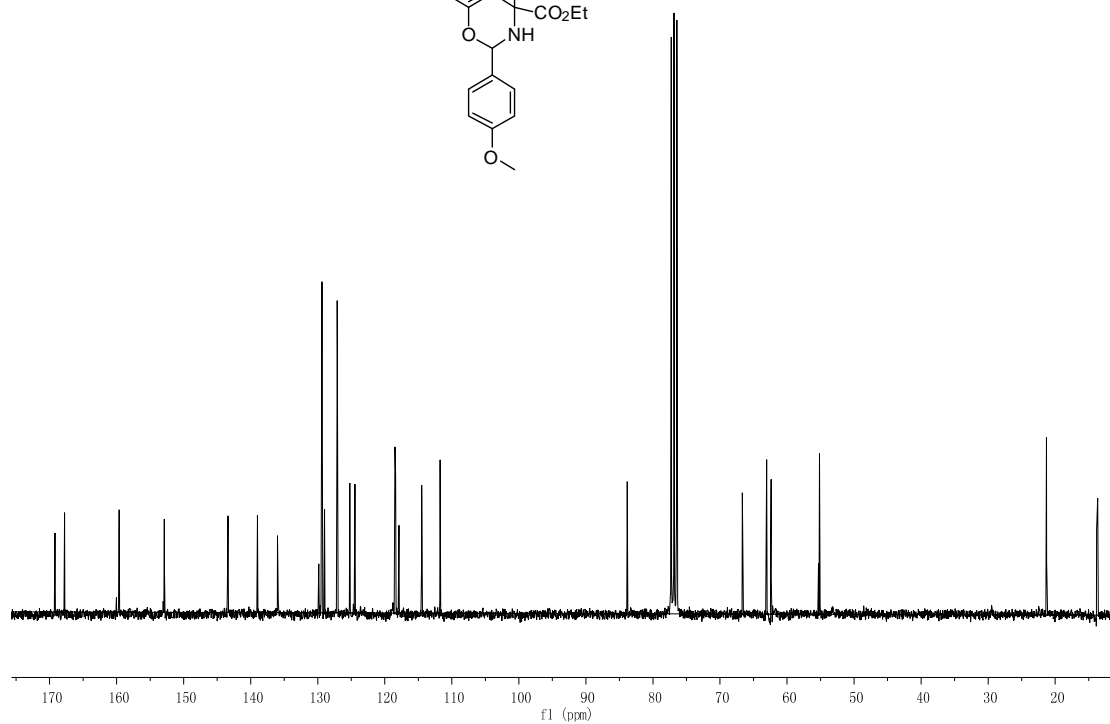

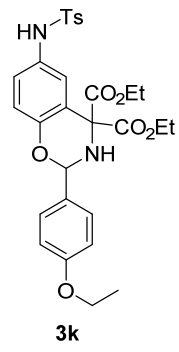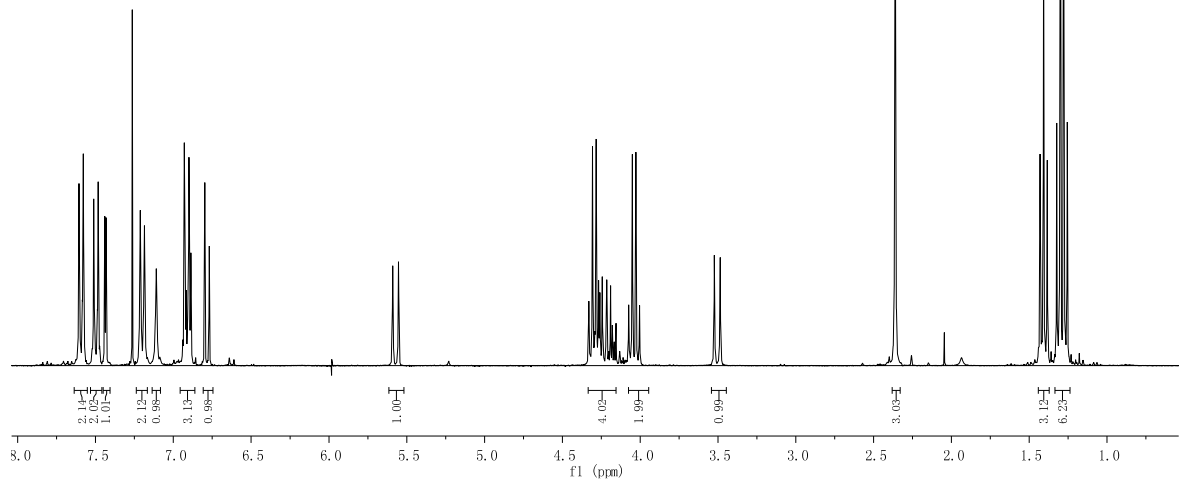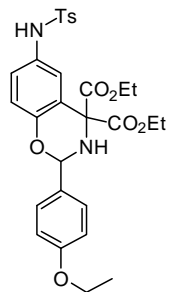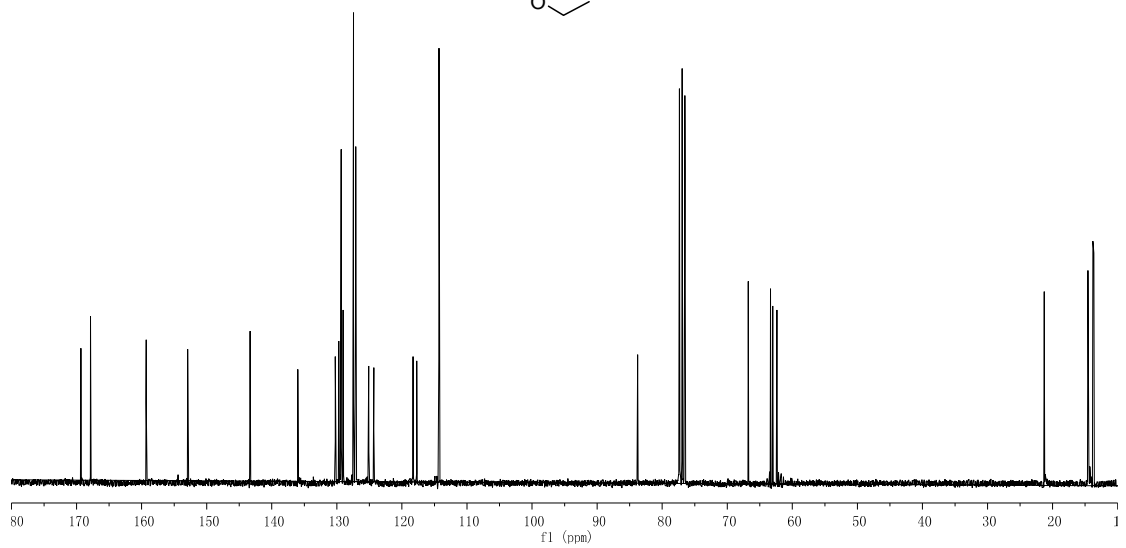

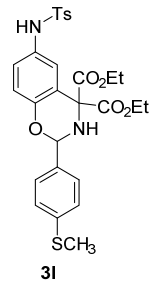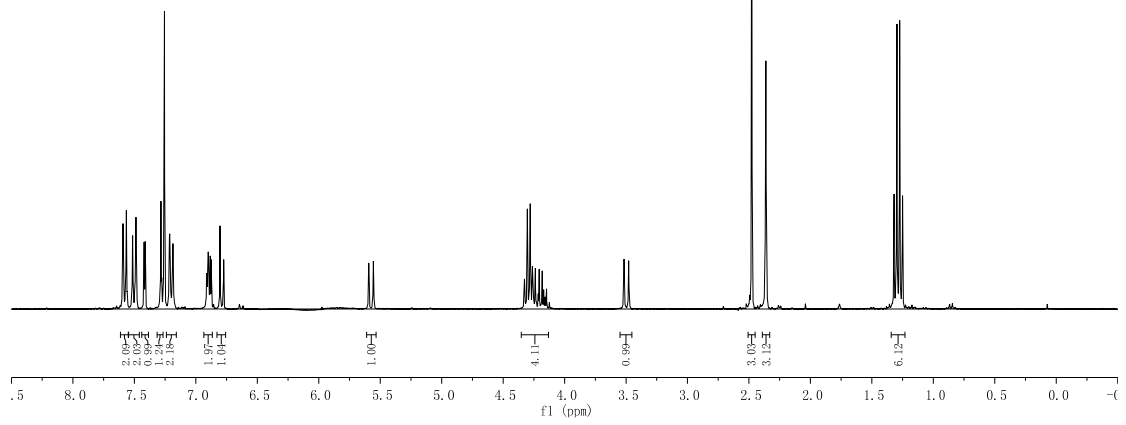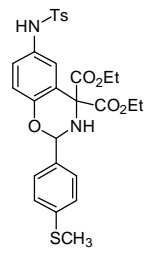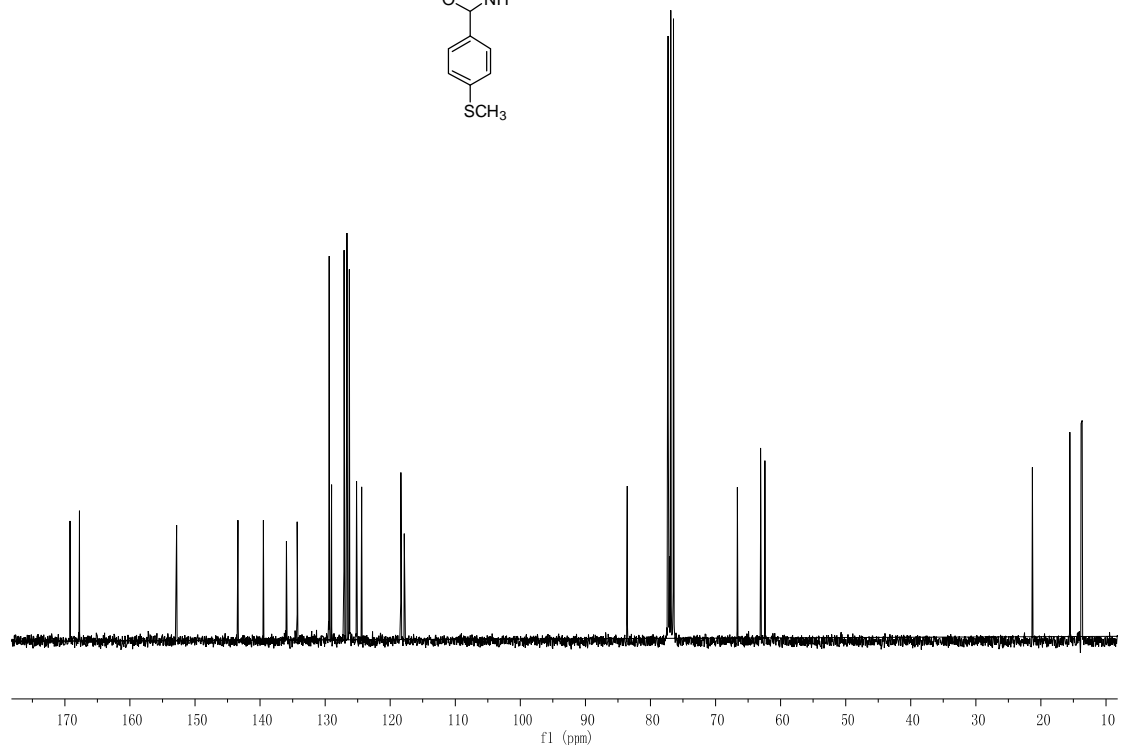



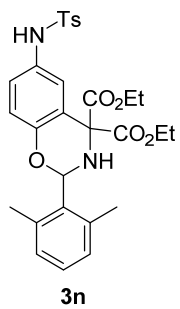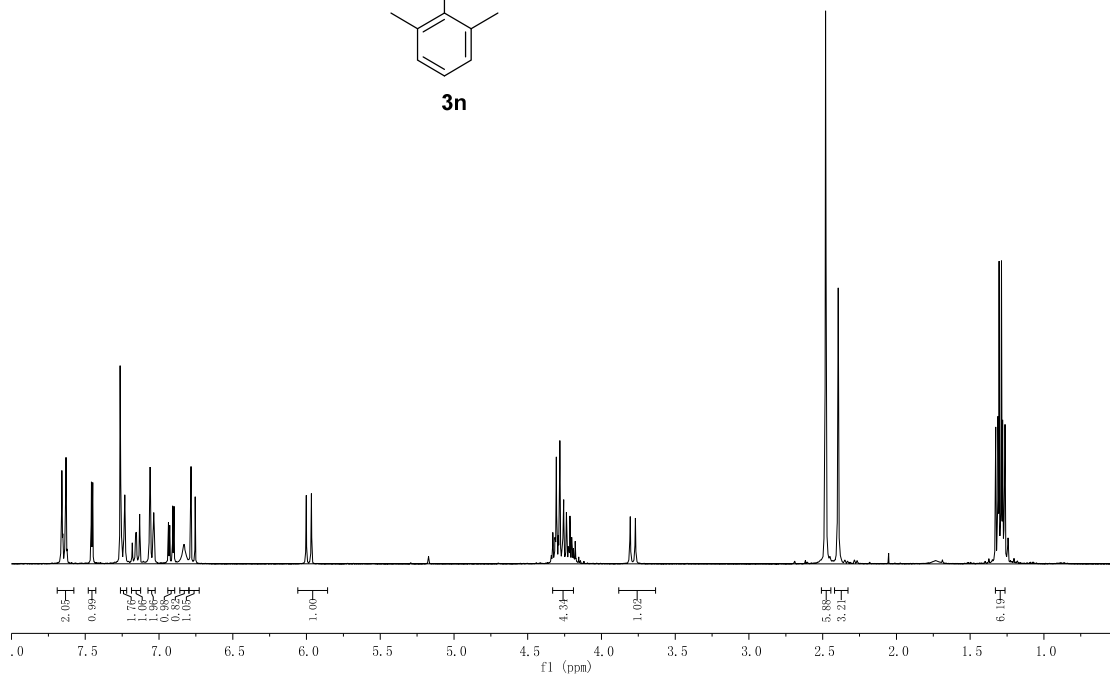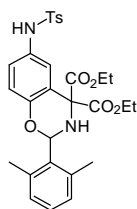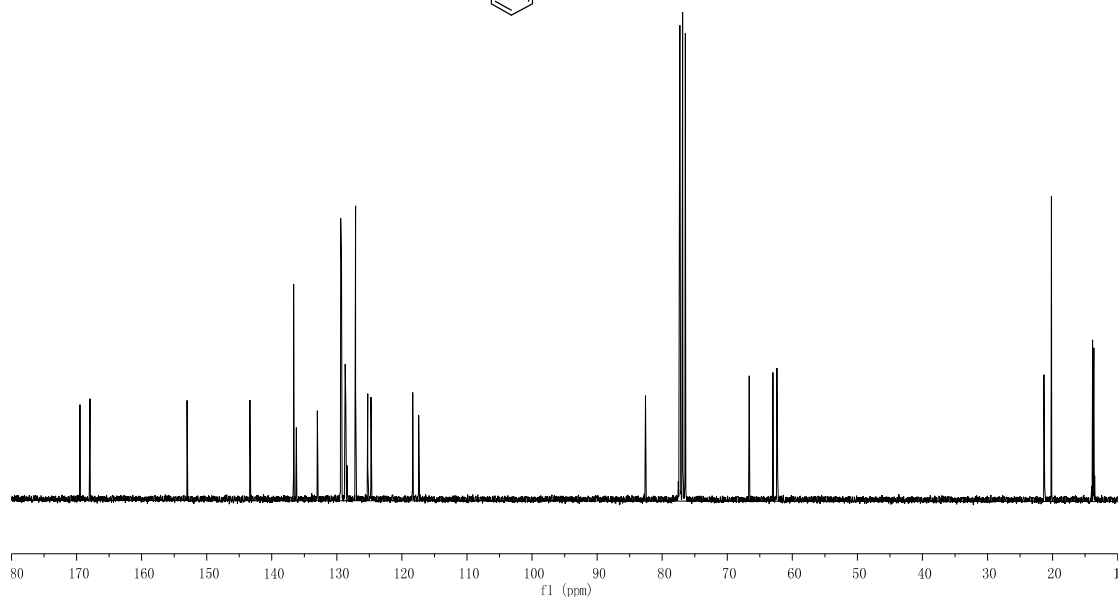



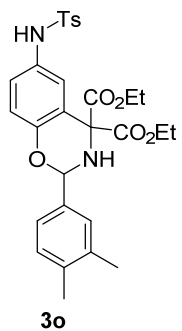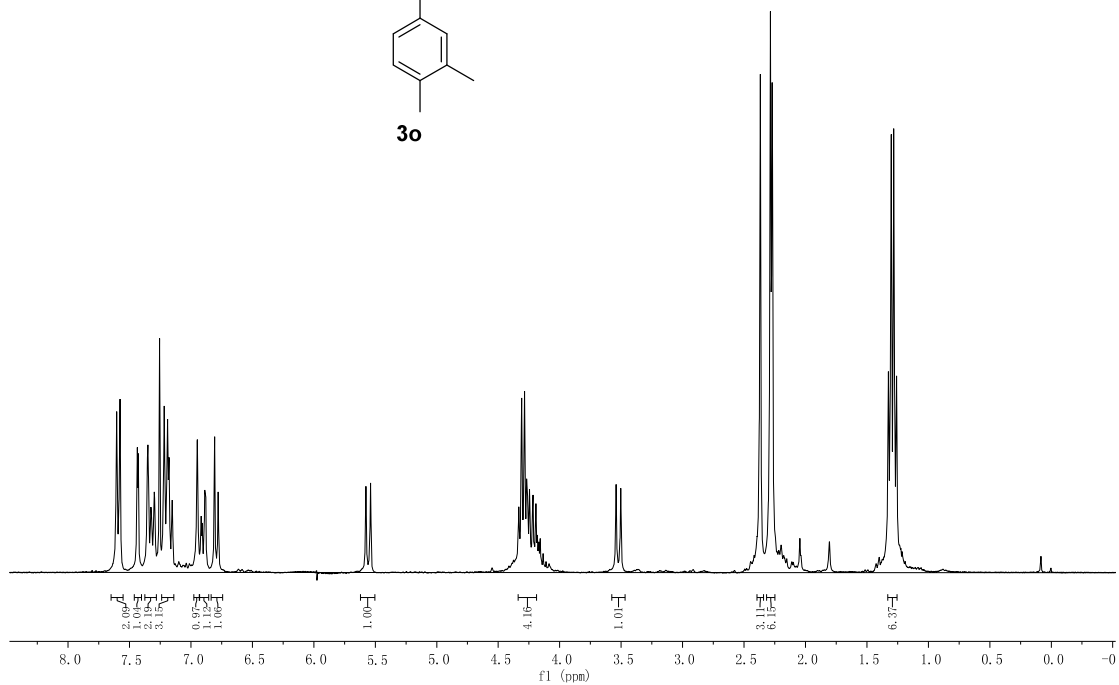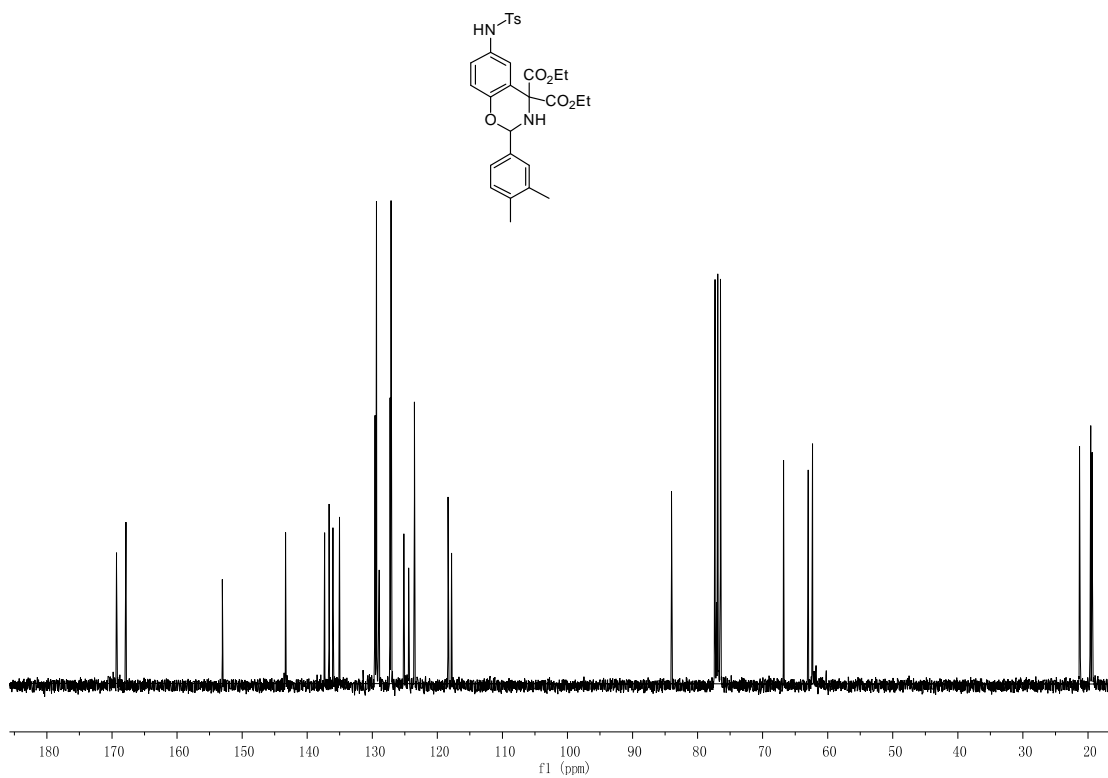

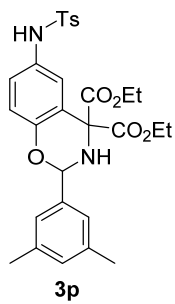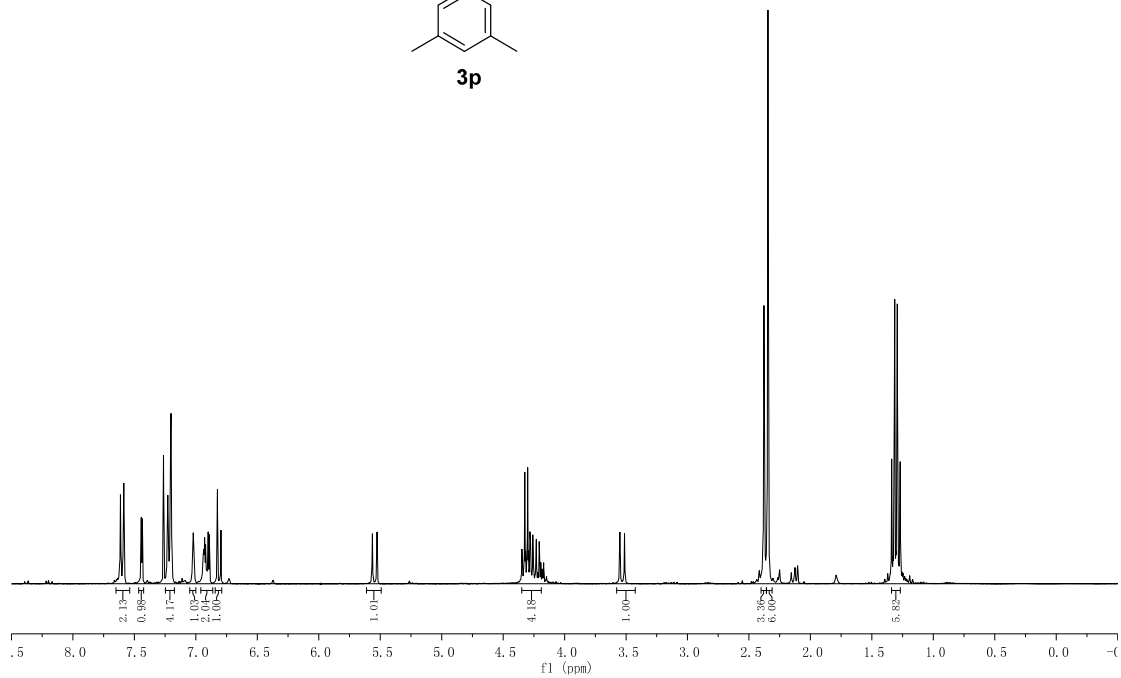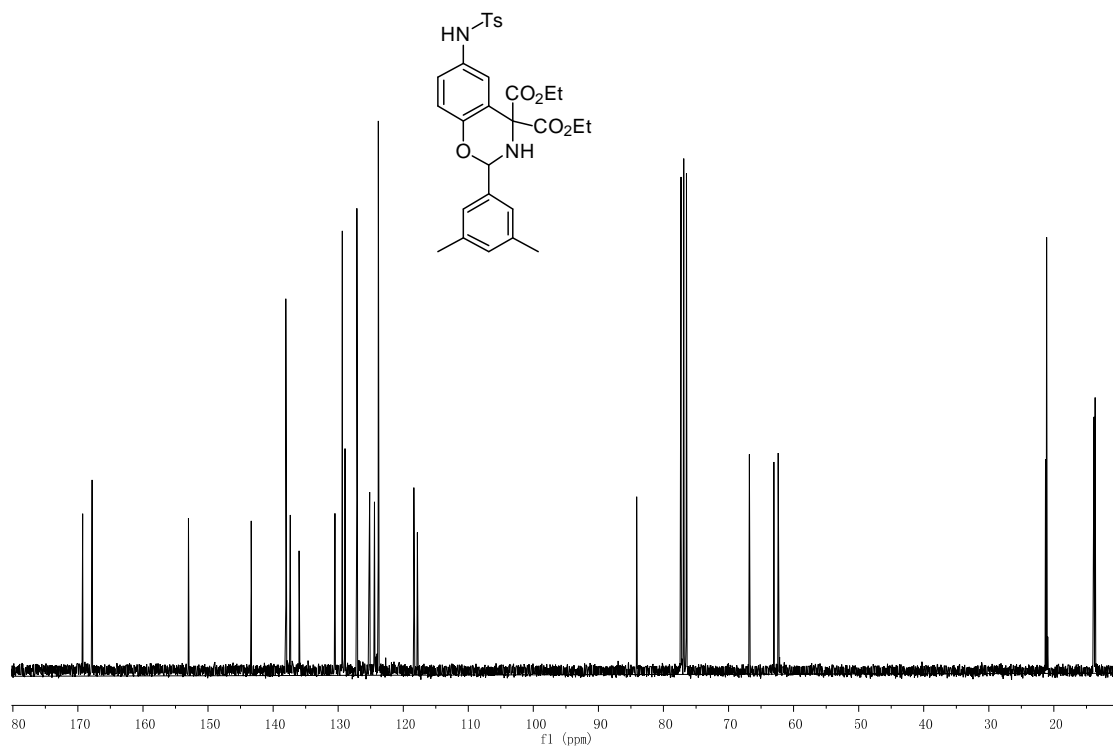

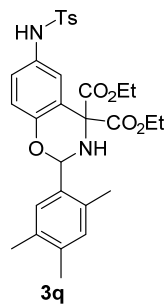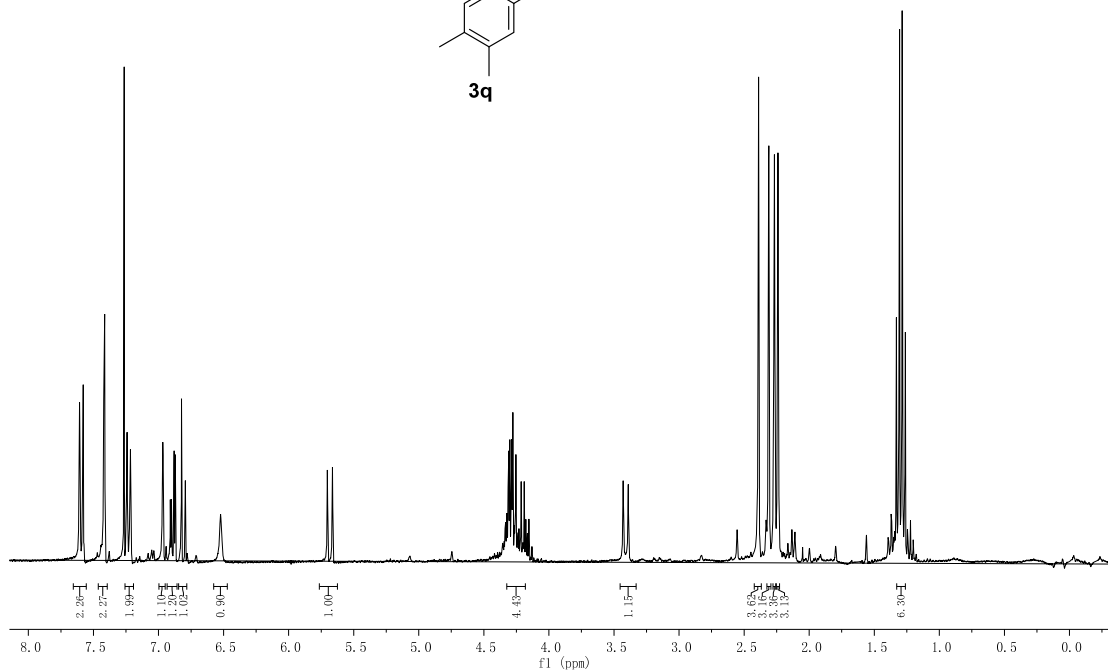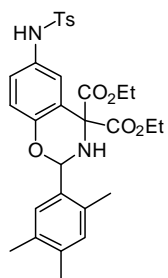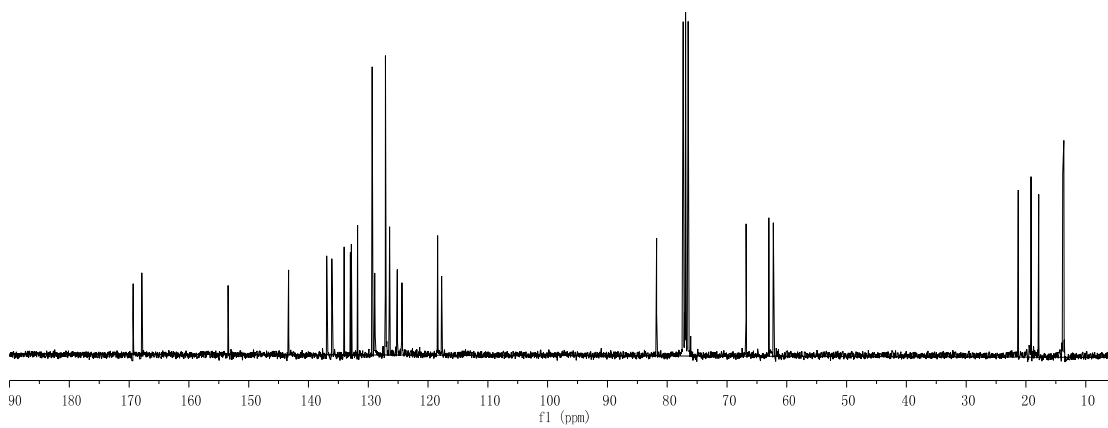

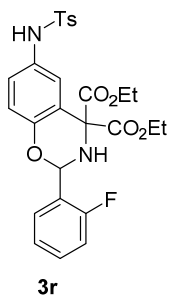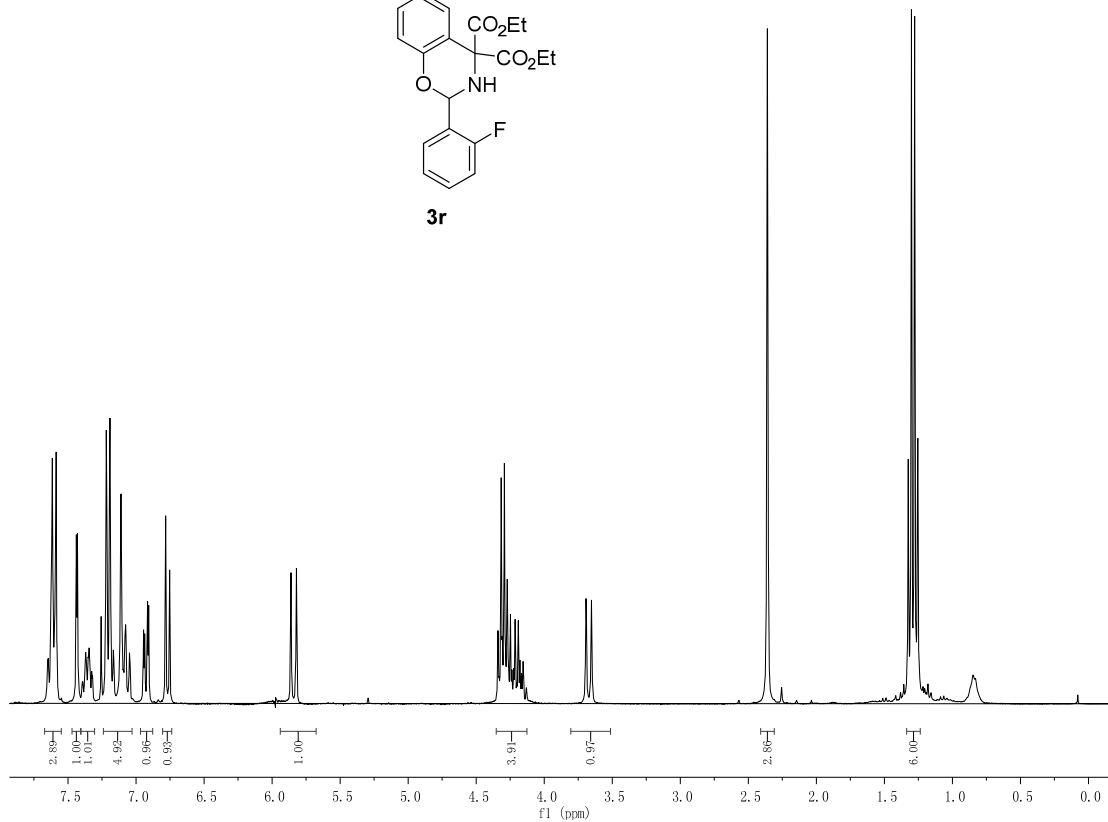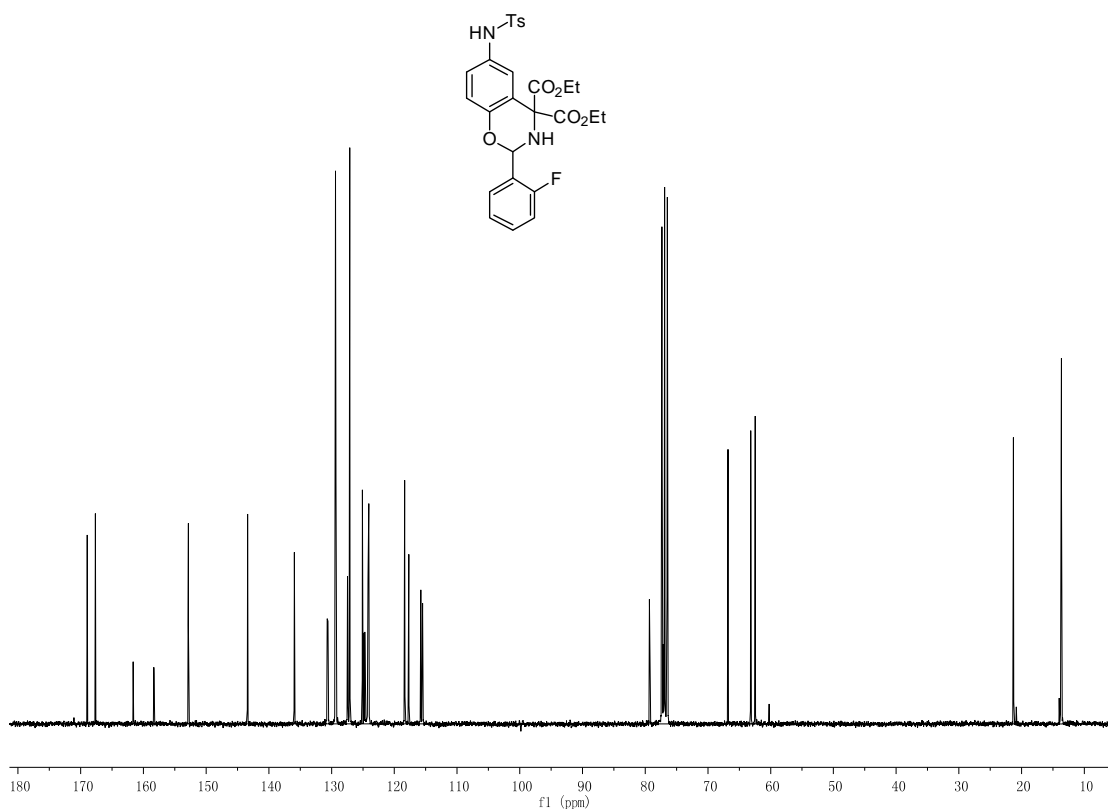

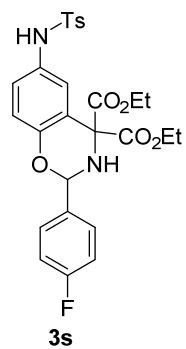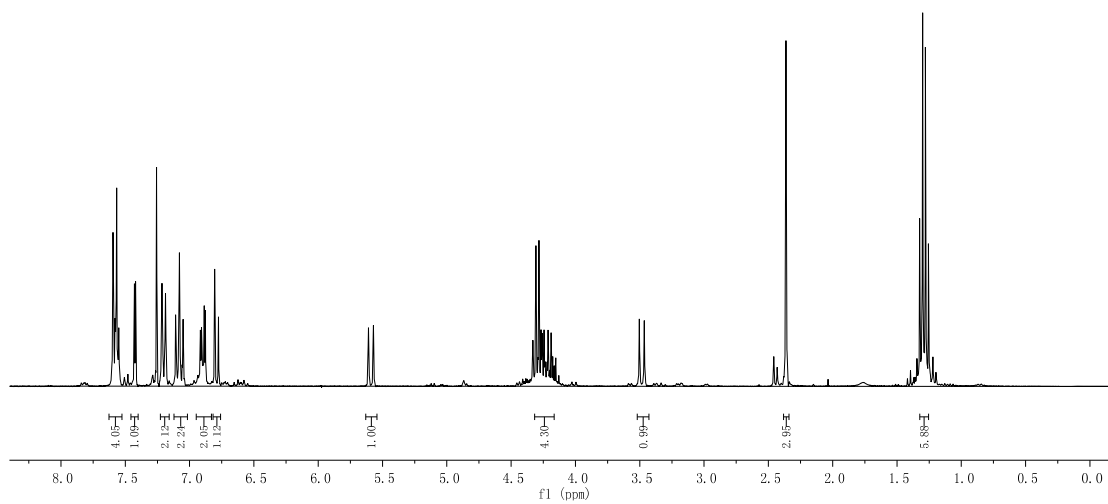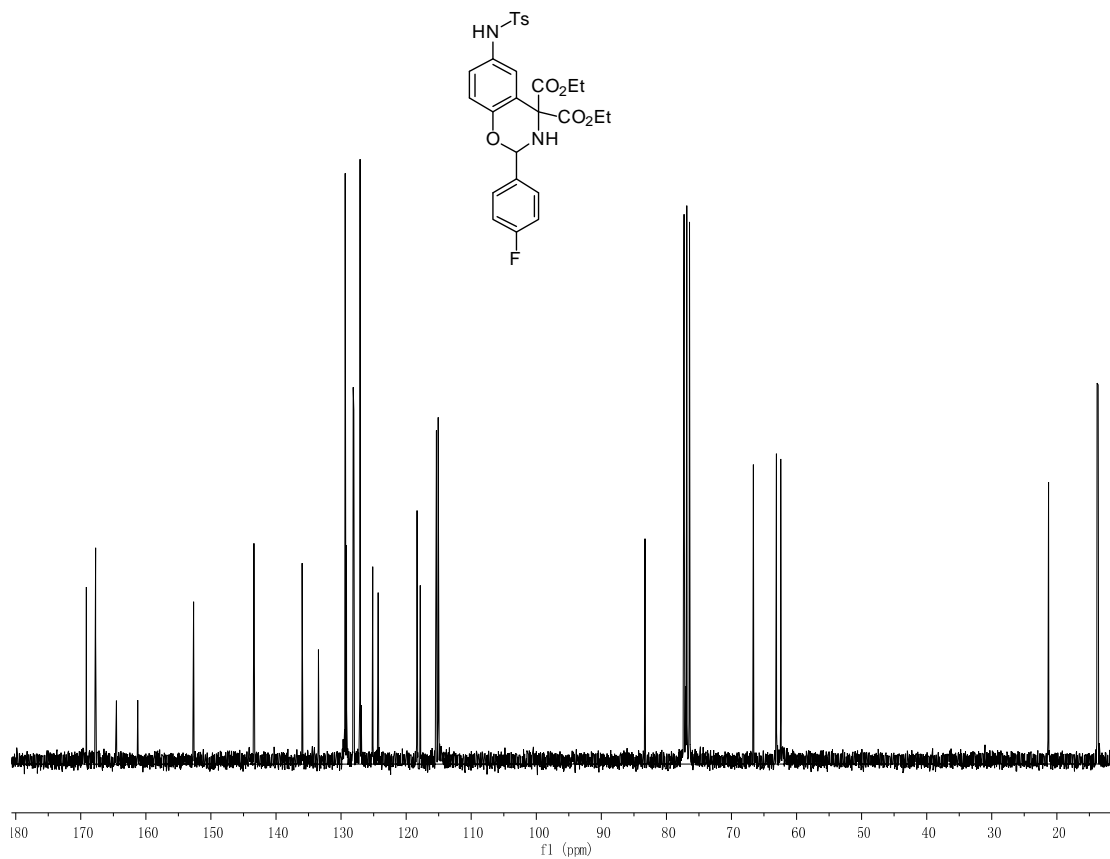

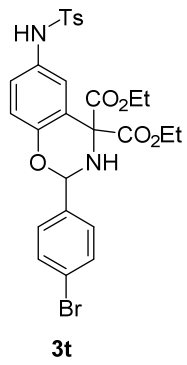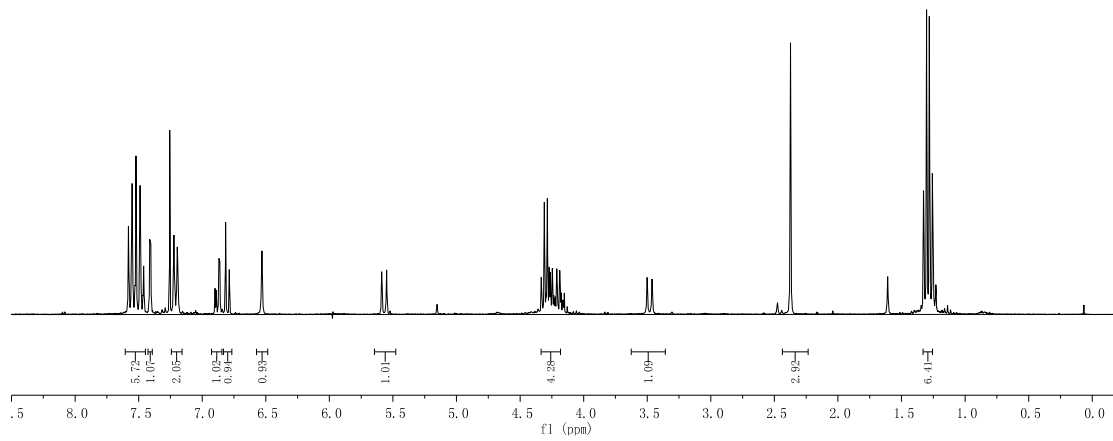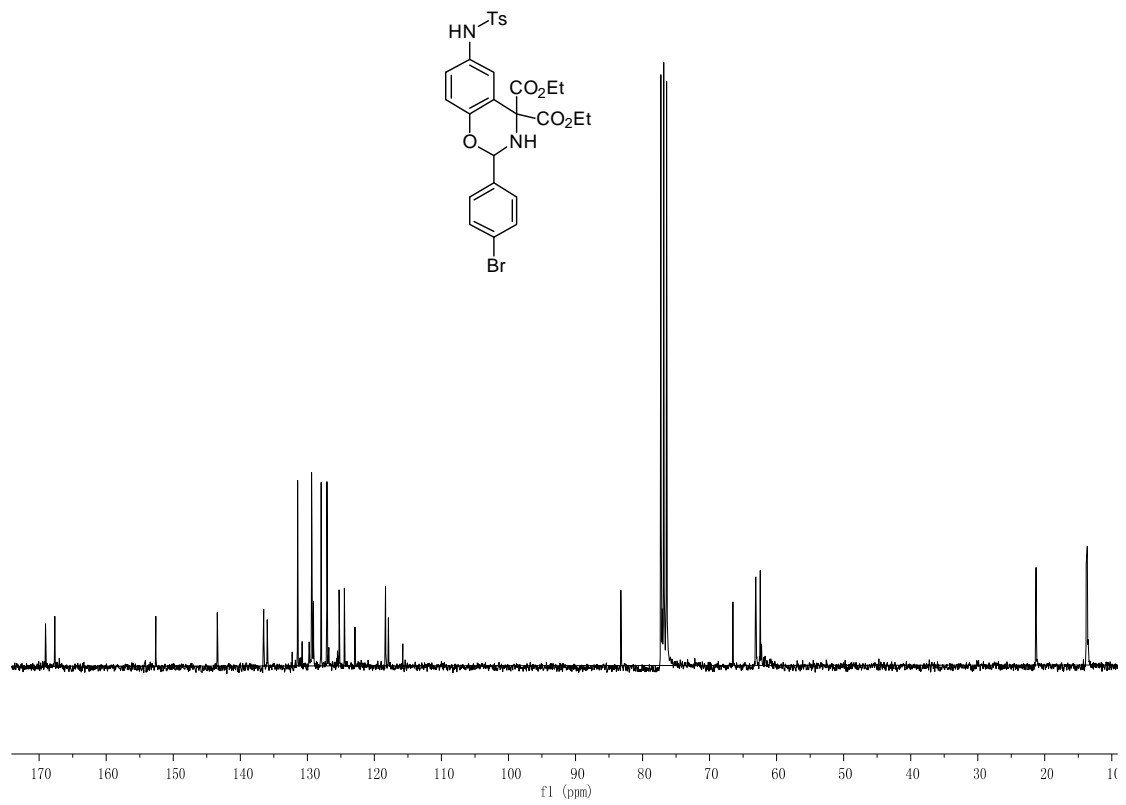

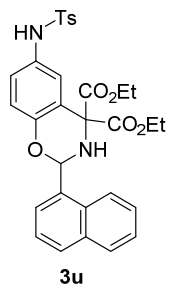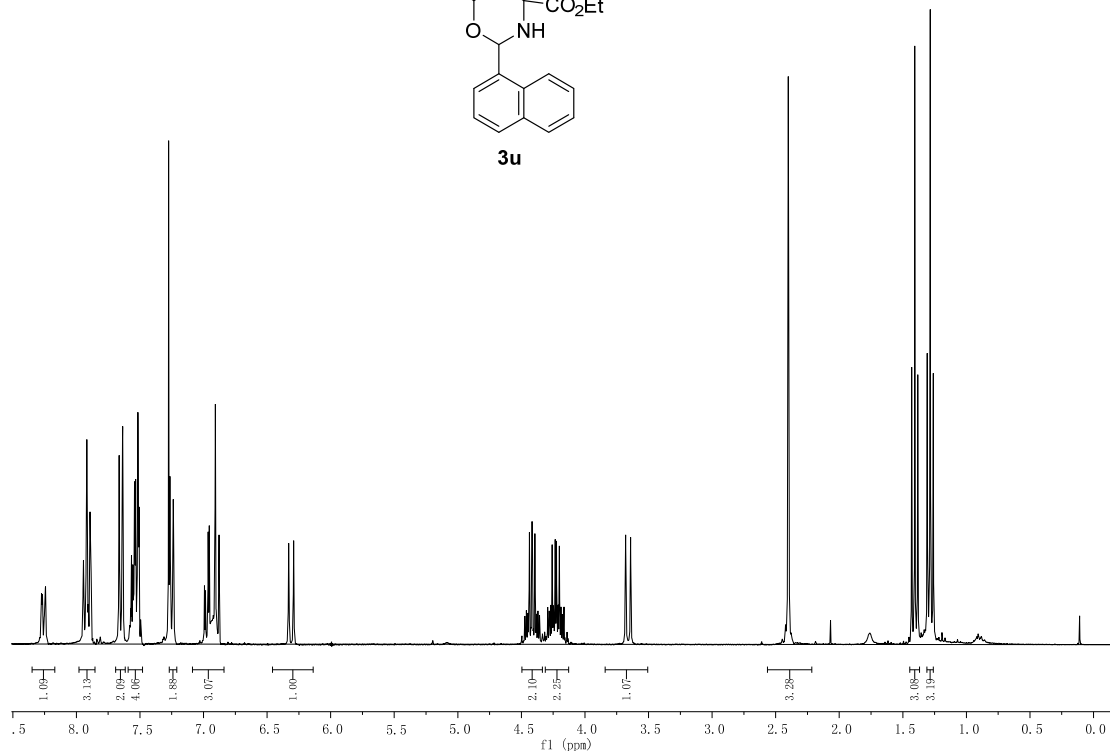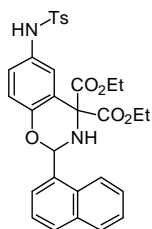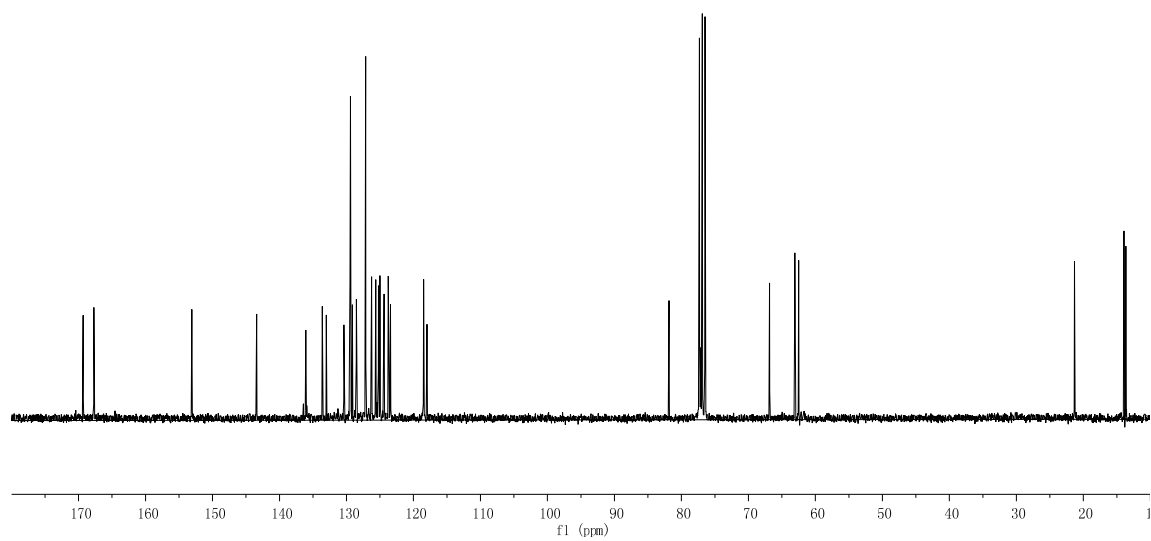

## X-Ray Crystallographic Data

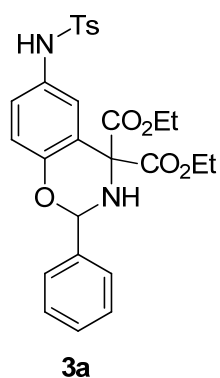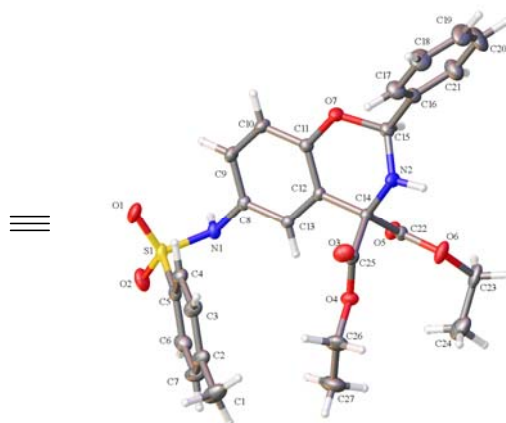

Table 1. Crystal data and structure refinement for **3a**

|                                   |                                             |                             |
|-----------------------------------|---------------------------------------------|-----------------------------|
| Identification code               | <b>3a</b>                                   |                             |
| Empirical formula                 | $C_{27}H_{28}N_2O_7S$                       |                             |
| Formula weight                    | 524.57                                      |                             |
| Temperature                       | 173.1500 K                                  |                             |
| Wavelength                        | 0.71073 Å                                   |                             |
| Crystal system                    | Monoclinic                                  |                             |
| Space group                       | C 1 2/c 1                                   |                             |
| Unit cell dimensions              | $a = 18.485(4)$ Å                           | $\alpha = 90^\circ$ .       |
|                                   | $b = 14.715(3)$ Å                           | $\beta = 105.79(3)^\circ$ . |
|                                   | $c = 20.774(4)$ Å                           | $\gamma = 90^\circ$ .       |
| Volume                            | $5437(2)$ Å <sup>3</sup>                    |                             |
| Z                                 | 8                                           |                             |
| Density (calculated)              | 1.282 Mg/m <sup>3</sup>                     |                             |
| Absorption coefficient            | 0.166 mm <sup>-1</sup>                      |                             |
| F(000)                            | 2208                                        |                             |
| Crystal size                      | 0.42 x 0.39 x 0.36 mm <sup>3</sup>          |                             |
| Theta range for data collection   | 2.038 to 27.495°.                           |                             |
| Index ranges                      | -24 ≤ h ≤ 23, -19 ≤ k ≤ 19, -26 ≤ l ≤ 26    |                             |
| Reflections collected             | 33938                                       |                             |
| Independent reflections           | 6213 [R(int) = 0.0430]                      |                             |
| Completeness to theta = 26.000°   | 99.6 %                                      |                             |
| Absorption correction             | Semi-empirical from equivalents             |                             |
| Max. and min. transmission        | 1.0000 and 0.8808                           |                             |
| Refinement method                 | Full-matrix least-squares on F <sup>2</sup> |                             |
| Data / restraints / parameters    | 6213 / 0 / 337                              |                             |
| Goodness-of-fit on F <sup>2</sup> | 1.243                                       |                             |
| Final R indices [I > 2σ(I)]       | R1 = 0.0691, wR2 = 0.1787                   |                             |
| R indices (all data)              | R1 = 0.0713, wR2 = 0.1842                   |                             |
| Extinction coefficient            | n/a                                         |                             |
| Largest diff. peak and hole       | 0.667 and -0.807 e.Å <sup>-3</sup>          |                             |
